# Supplementary material for: Photophysical and electrochemical properties and temperature dependent geometrical isomerism in alkyl quinacridonediimines
Source: Royal Society of Chemistry journal article supplement (doi:10.1039/c3nj00477e), 2013-11-27
Supplement: c3nj00477e.pdf [file c3nj00477e.pdf]

Manuscript ID NJ-ART-05-2013-000477

## Supporting Information

# Photophysical, Electrochemical Properties and Temperature Dependent Geometrical Isomerism in Alkyl Quinacridonediimines

Iqbal Javed<sup>a,b,c\*</sup>, Ayub Khurshid<sup>d,f\*</sup>, Muhammad Nadeem Arshad<sup>e</sup>, Yue Wang<sup>a</sup>

<sup>a</sup> State Key Laboratory of Supramolecular Structure and Materials, College of Chemistry, Jilin University, Changchun 130012, P. R. China.

<sup>b</sup> Department of chemistry, Umeå University, SE-901 87 Umeå, Sweden.

<sup>c</sup> Department of Chemistry & Biochemistry, University of Agriculture, Faisalabad, Pakistan.

<sup>d</sup> Centre of Excellence for Advanced Materials Research (CEAMR), King Abdulaziz University, P. O. Box 80203, Jeddah 21589, Saudi Arabia.

<sup>e</sup> Department of Chemistry, COMSATS Institute of Information Technology, Abbottabad, KPK, Pakistan 22060

<sup>f</sup> Department of Chemistry, College of Science, King Faisal University, Al-Ahsa 31982 Kingdom of Saudi Arabia

**Corresponding author: E-mail: [javedkhattak79@gmail.com](mailto:javedkhattak79@gmail.com). & [kayub@kfu.edu.sa](mailto:kayub@kfu.edu.sa) (for calculations)**

### Contents

|                                                                     |                  |
|---------------------------------------------------------------------|------------------|
| <sup>1</sup> HNMR spectrum of compound <b>1-10</b>                  | <b>pg. 3-7</b>   |
| Variable temperature <sup>1</sup> HNMR (213K-303K) of <b>2</b>      | <b>pg. 8-12</b>  |
| Variable temperature <sup>1</sup> HNMR (298-335K) of <b>2</b>       | <b>pg. 13-15</b> |
| Variable temperature <sup>1</sup> HNMR (230K-298K) of <b>7</b>      | <b>pg. 16-18</b> |
| Variable temperature <sup>1</sup> HNMR (230K-298K) of <b>10</b>     | <b>pg. 19-21</b> |
| Variable high temperature <sup>1</sup> HNMR (298K-338K) of <b>7</b> | <b>pg. 22-23</b> |
| <sup>13</sup> CNMR spectrum of compound <b>7&amp;10</b>             | <b>pg. 24</b>    |
| <b>S-1: Crystal Data of Compounds 2, 3, 6, 7, 8 and 10</b>          | <b>pg.25-26</b>  |

**Table.1.** Reaction conditions for compounds **2-10** **pg.27**

**Table.2.** Photophysical properties of compounds **1-10** **pg.27**

**Table.3.** A comparison of eigenvalues of HOMOs and LUMOs of Quinacridonediimines **1-10** (A and B) at three different levels of theory. **pg.28**

**Table .4.** A comparison of eigenvalues of HOMOs and LUMOs of quinacridones **1-10** (A and B), theoretical and experimental **pg.29**

**S-2 :** Cyclic votammograms of compound **1-10** recorded in CH<sub>2</sub>Cl<sub>2</sub> with scan rate of 100mVs<sup>-1</sup>  
**pg. 29**

**Table 5.** Electrochemical data and HOMO, LUMO energy level of compounds **1-10**  
**pg. 30-31**

**Table.6.** Absoulte and relative energies (parenthesis) of **EE**, **EZ** and **ZZ** isomers of Quinacridonediimines **7** and **10**  
**pg. 32**

**Table.7.** Calculated energies of EE, EZ and ZZ isomers of Quinacridonediimines **7** and **10**  
**pg. 32-50**

### $^1\text{H}$ NMR spectrum of Compound 1

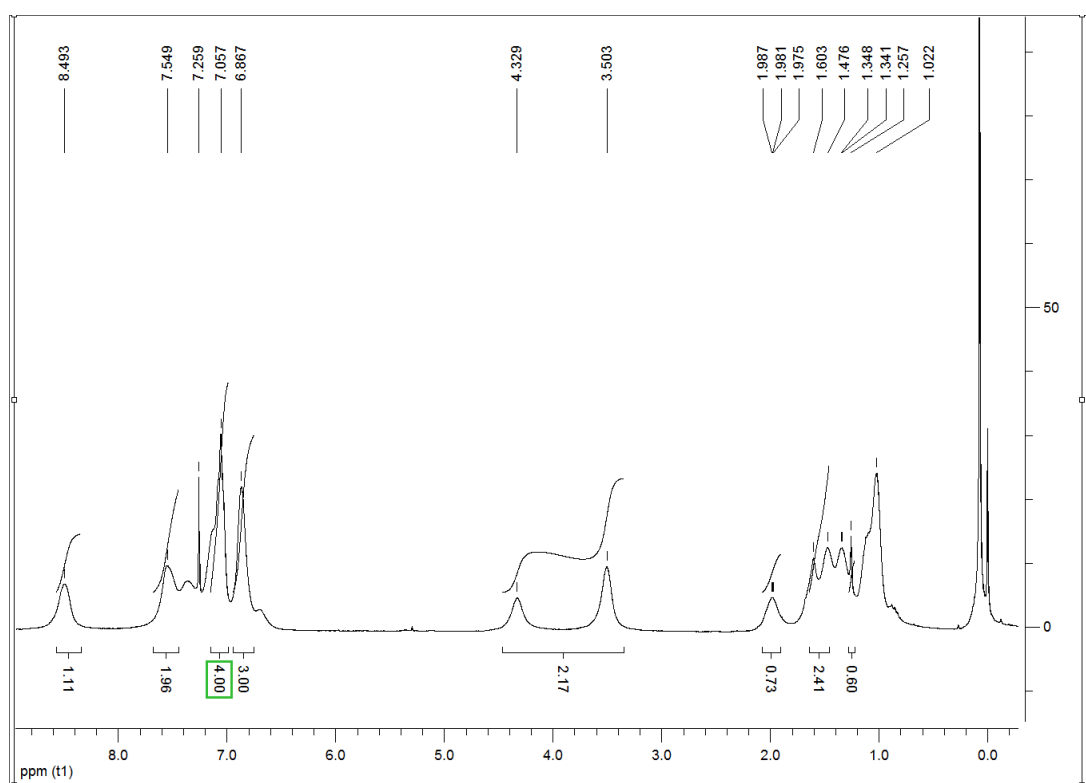

### $^1\text{H}$ NMR spectrum of Compound 2

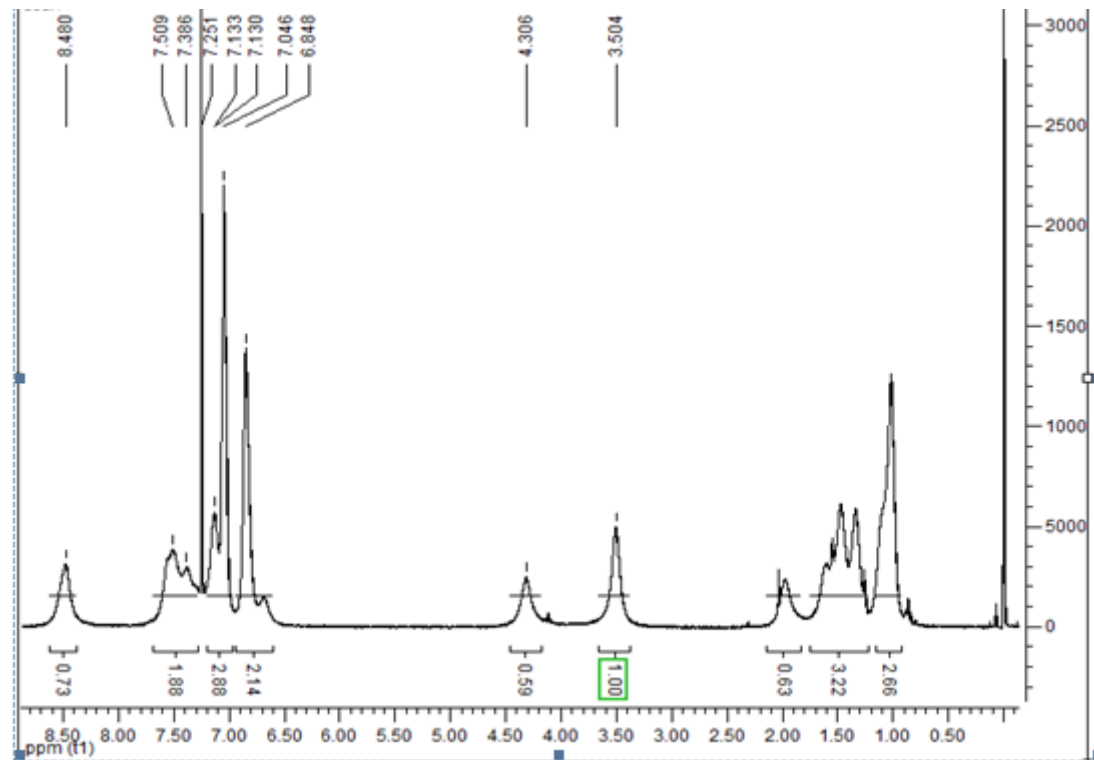

### $^1\text{H}$ NMR spectrum of Compound 3

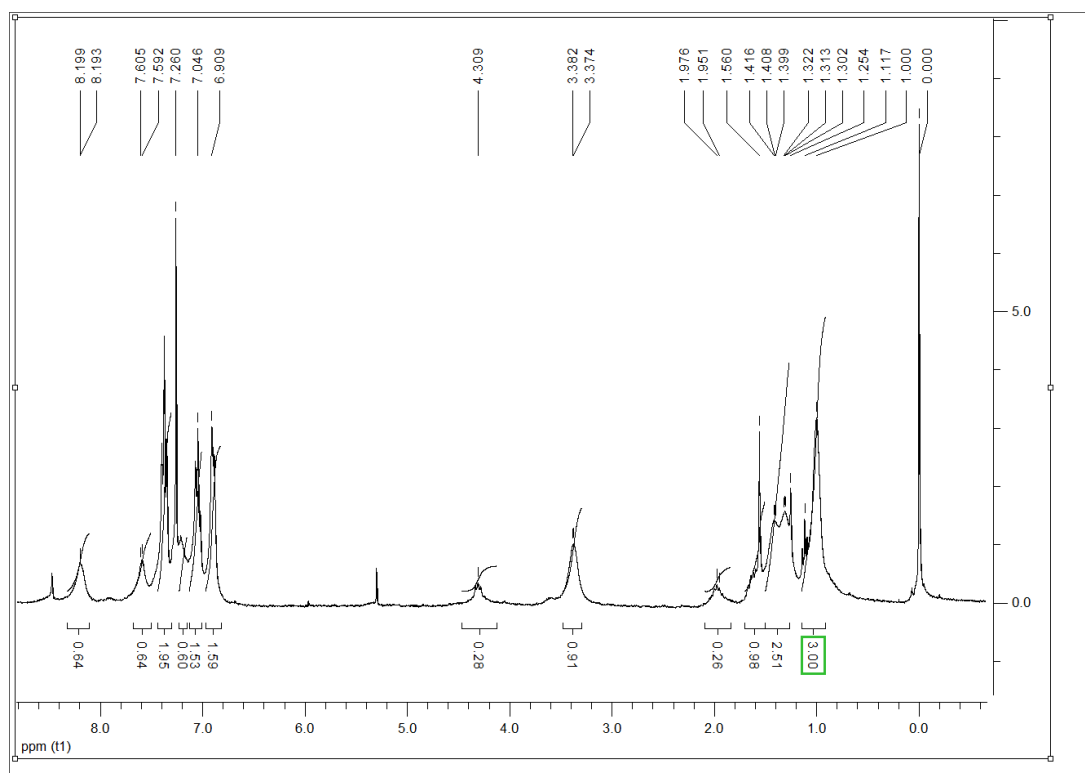

### $^1\text{H}$ NMR spectrum of Compound 4

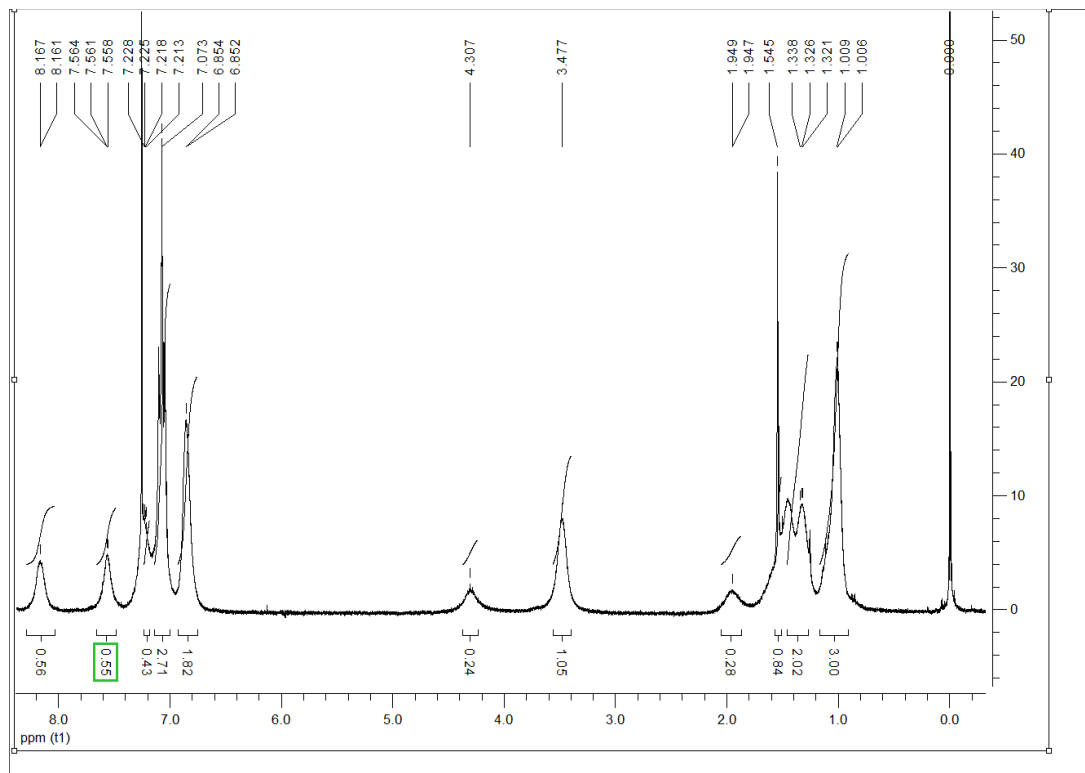

### $^1\text{H}$ NMR spectrum of Compound 5

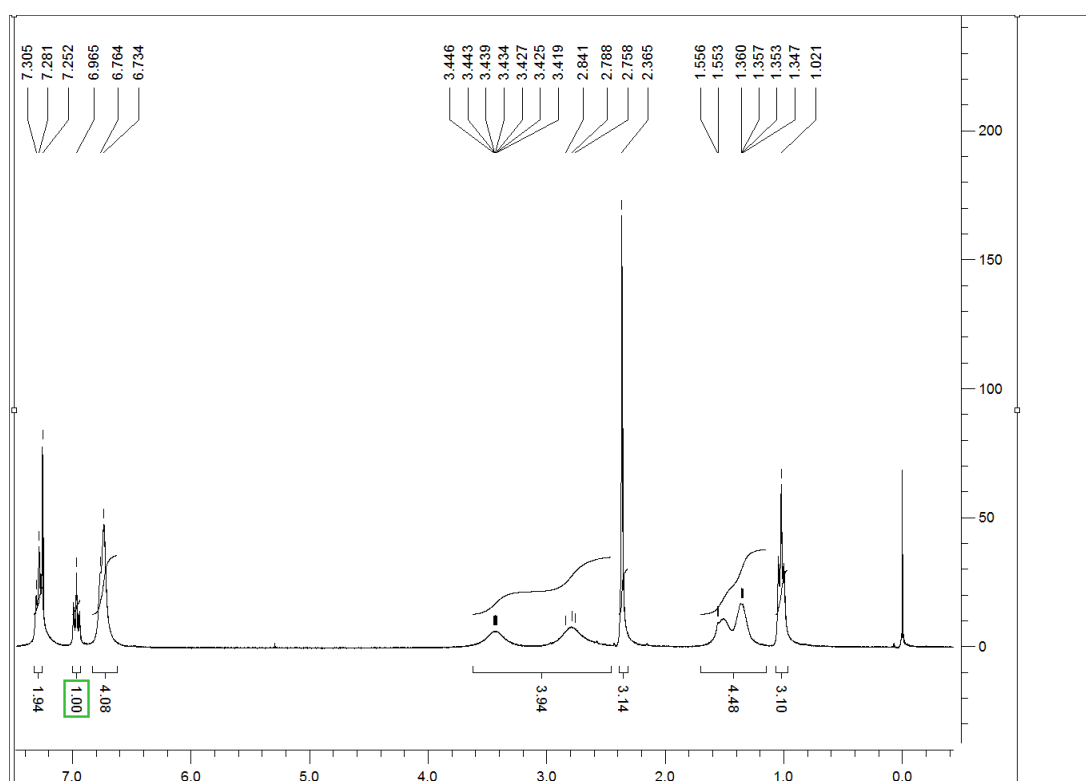

### $^1\text{H}$ NMR spectrum of Compound 6

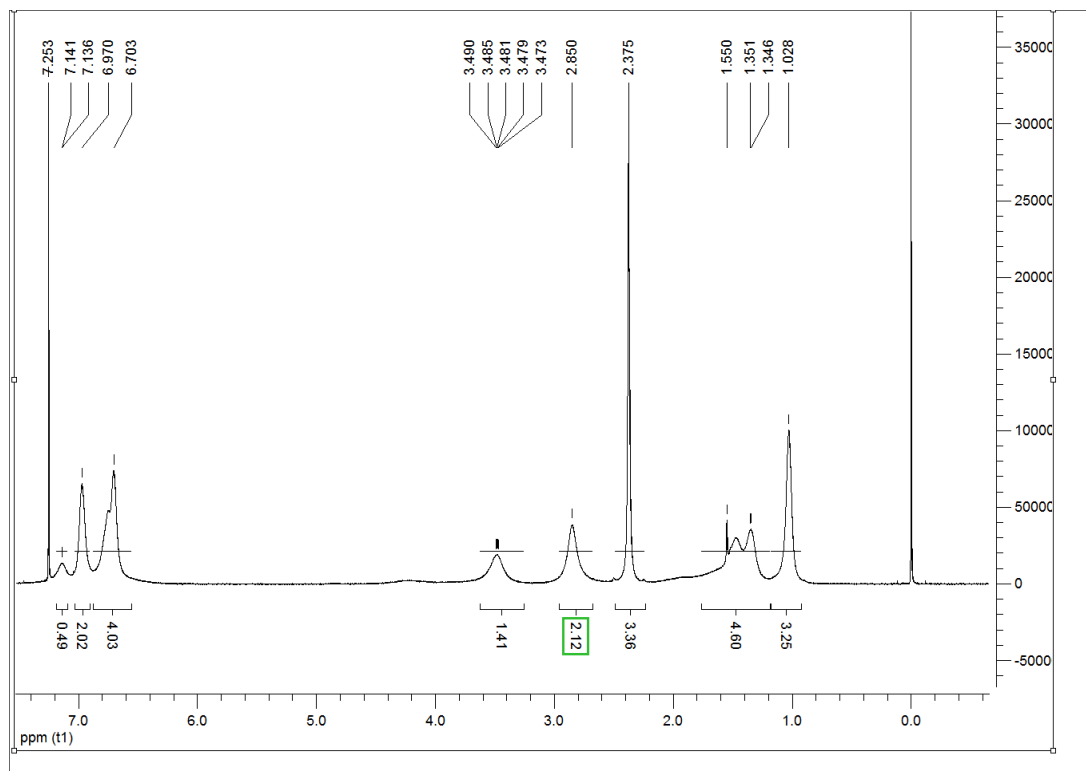

$^1\text{H}$  NMR spectrum of Compound 7

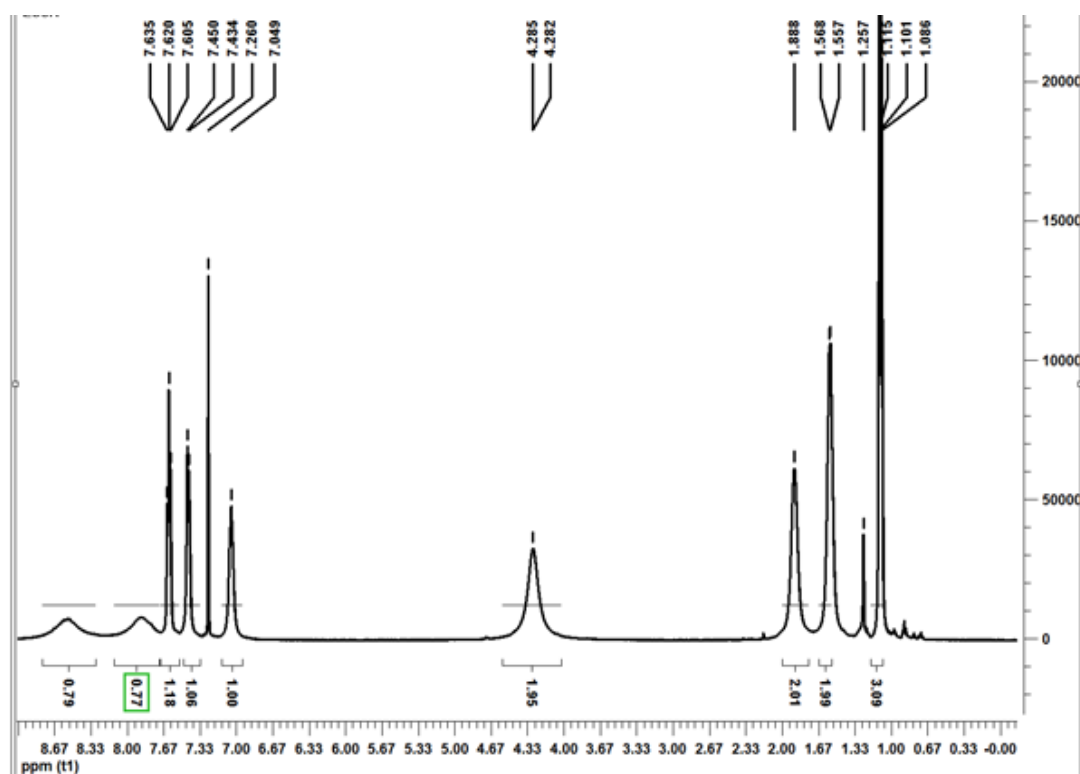

$^1\text{H}$  NMR spectrum of Compound 8

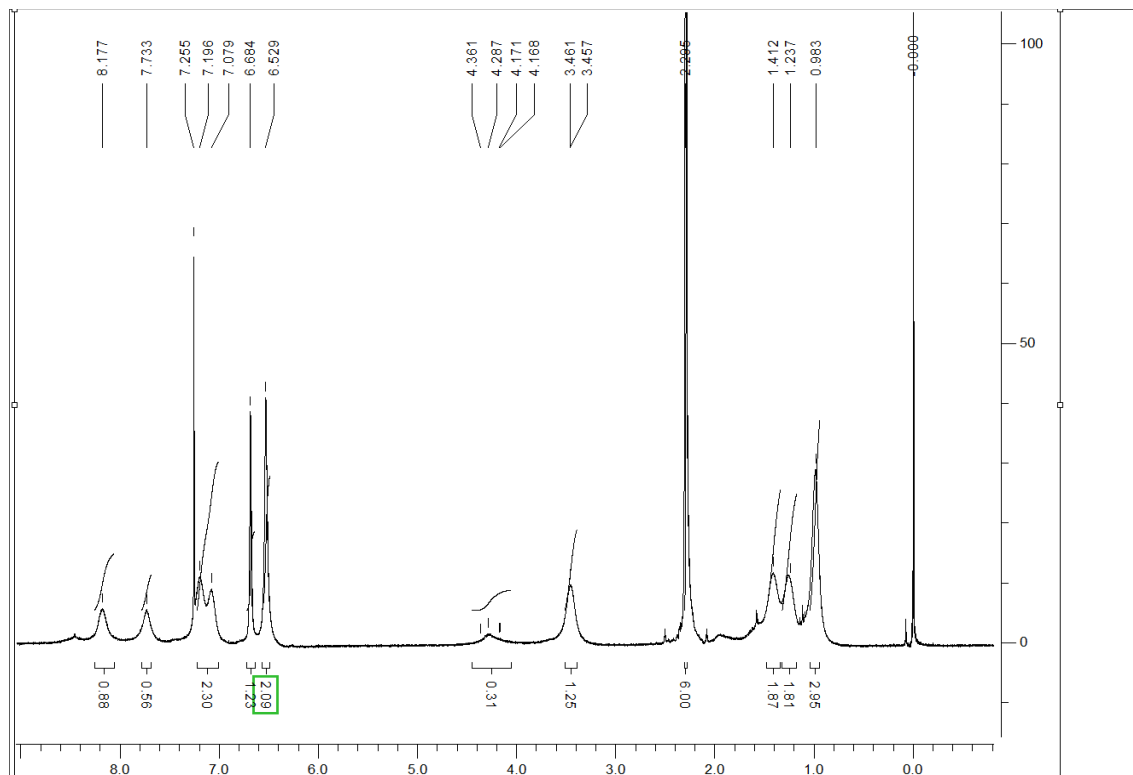

### <sup>1</sup>H NMR spectrum of Compound 9

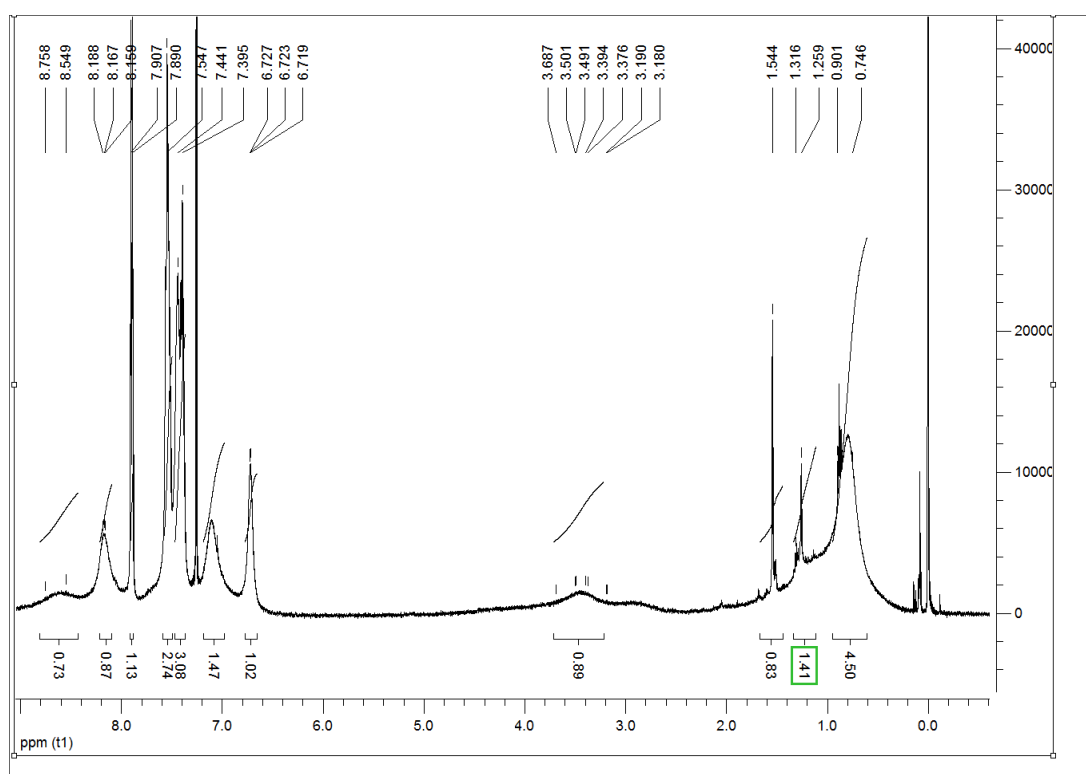

### <sup>1</sup>H NMR spectrum of Compound 10

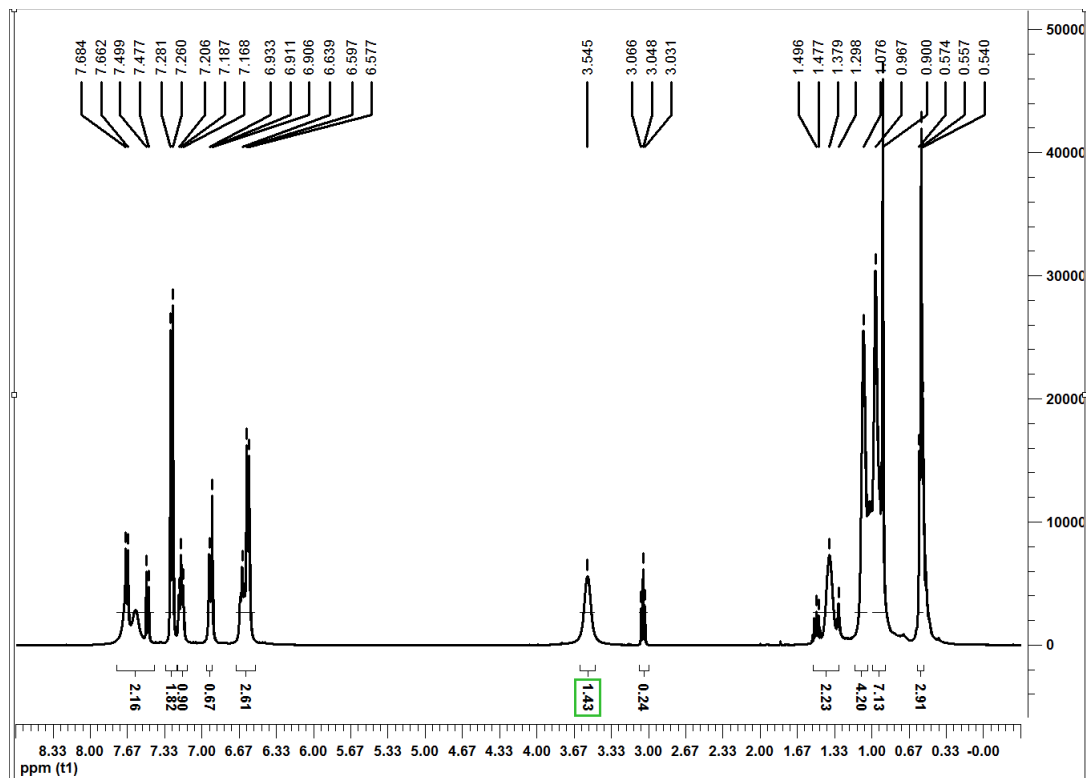

Variable temperature  $^1\text{H}$ NMR (213K-303K) of **2**

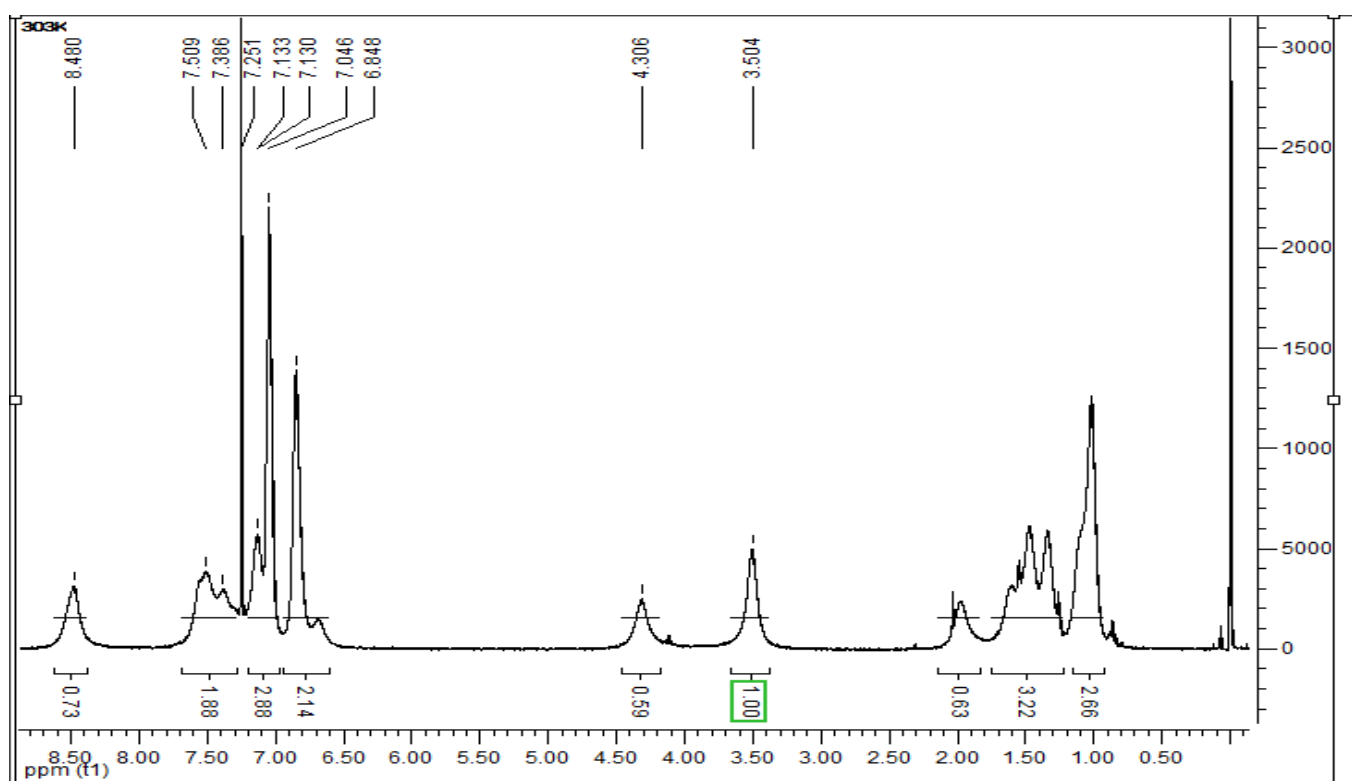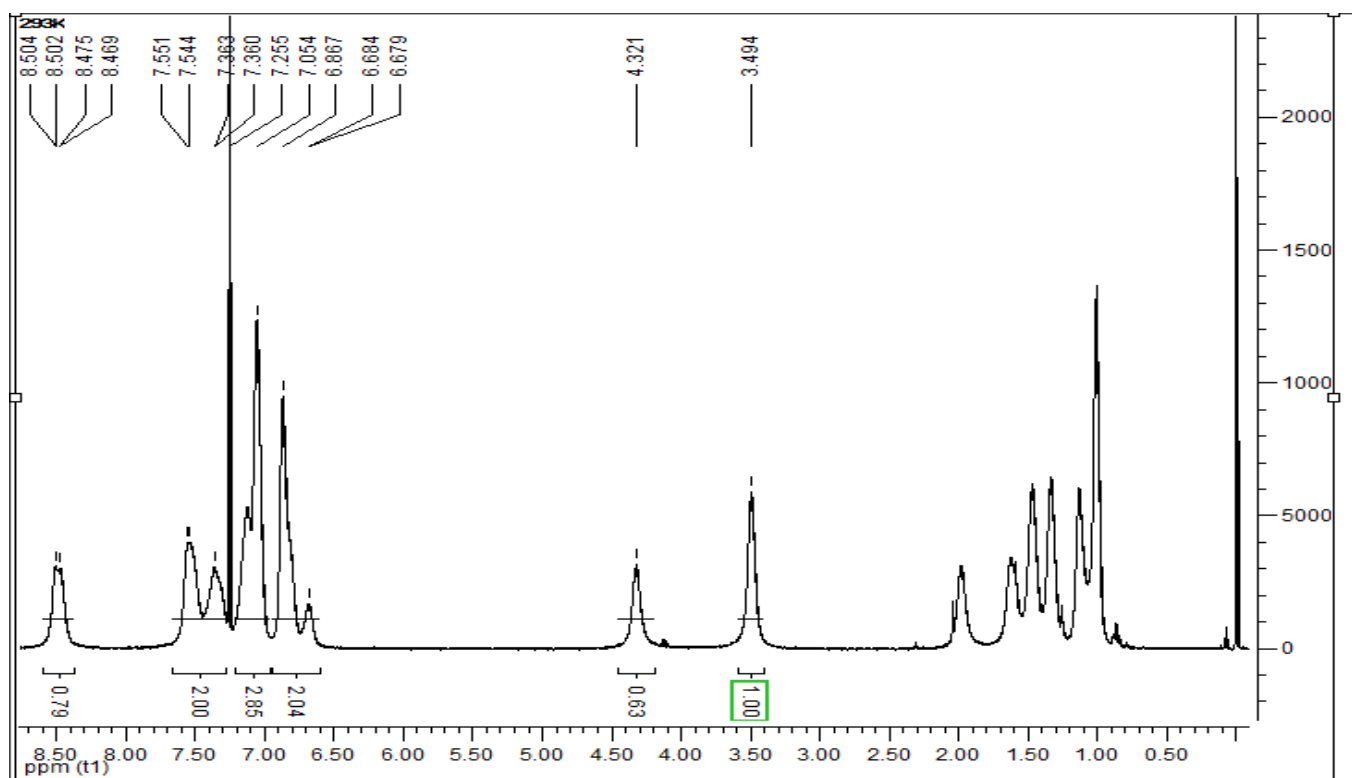



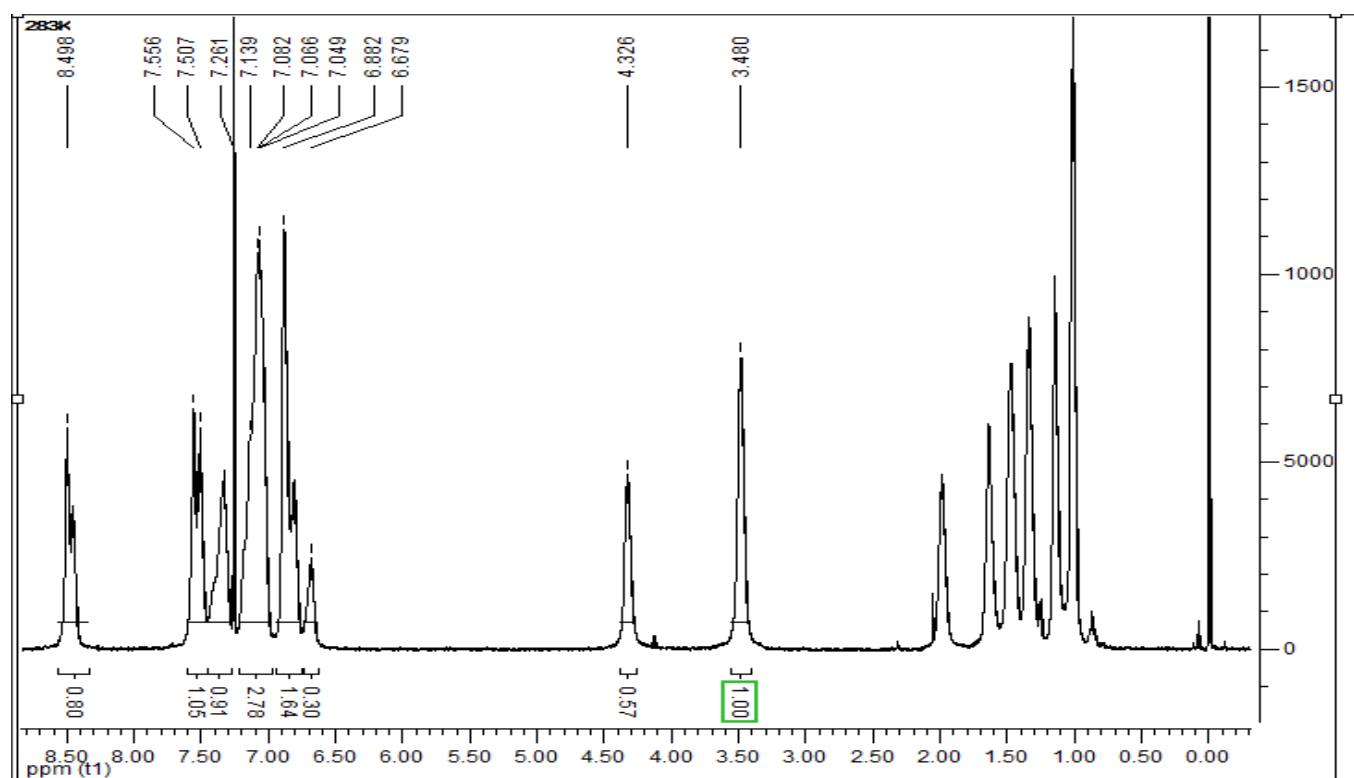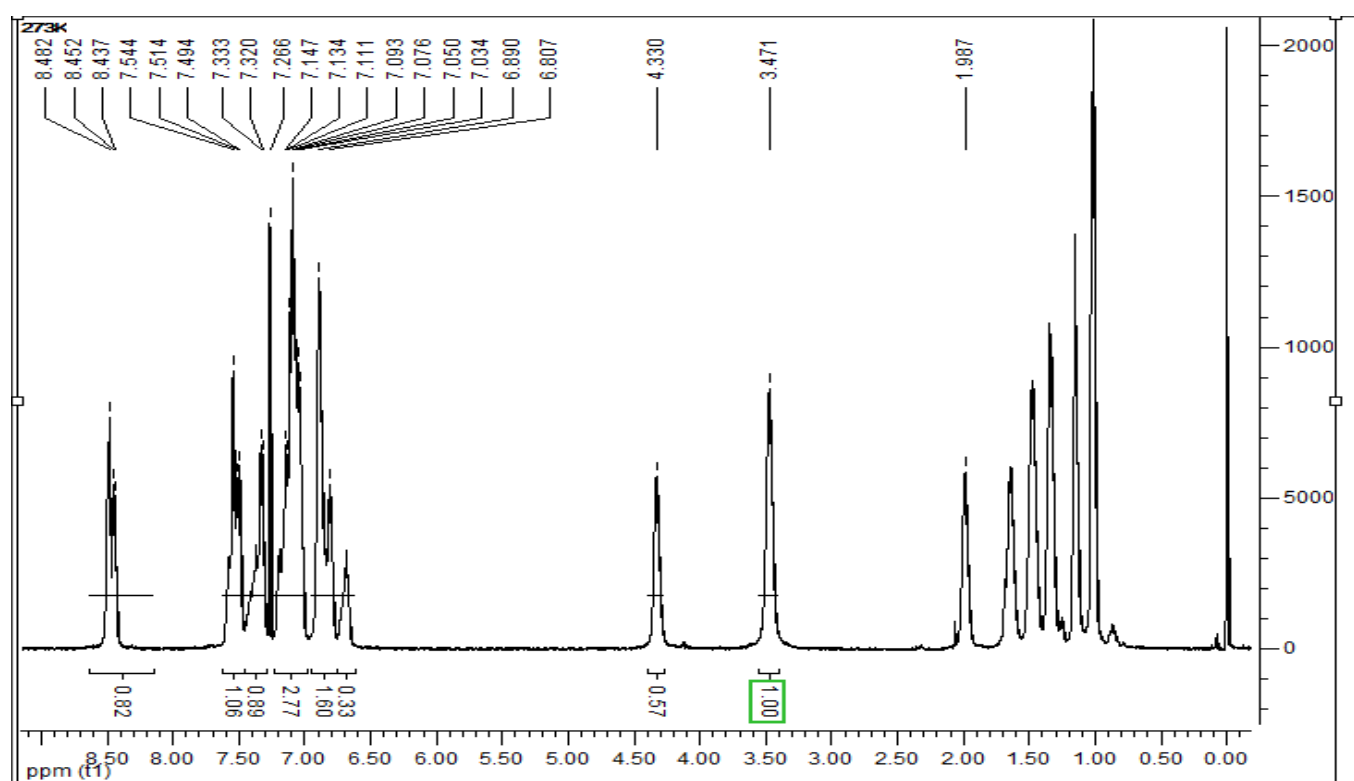



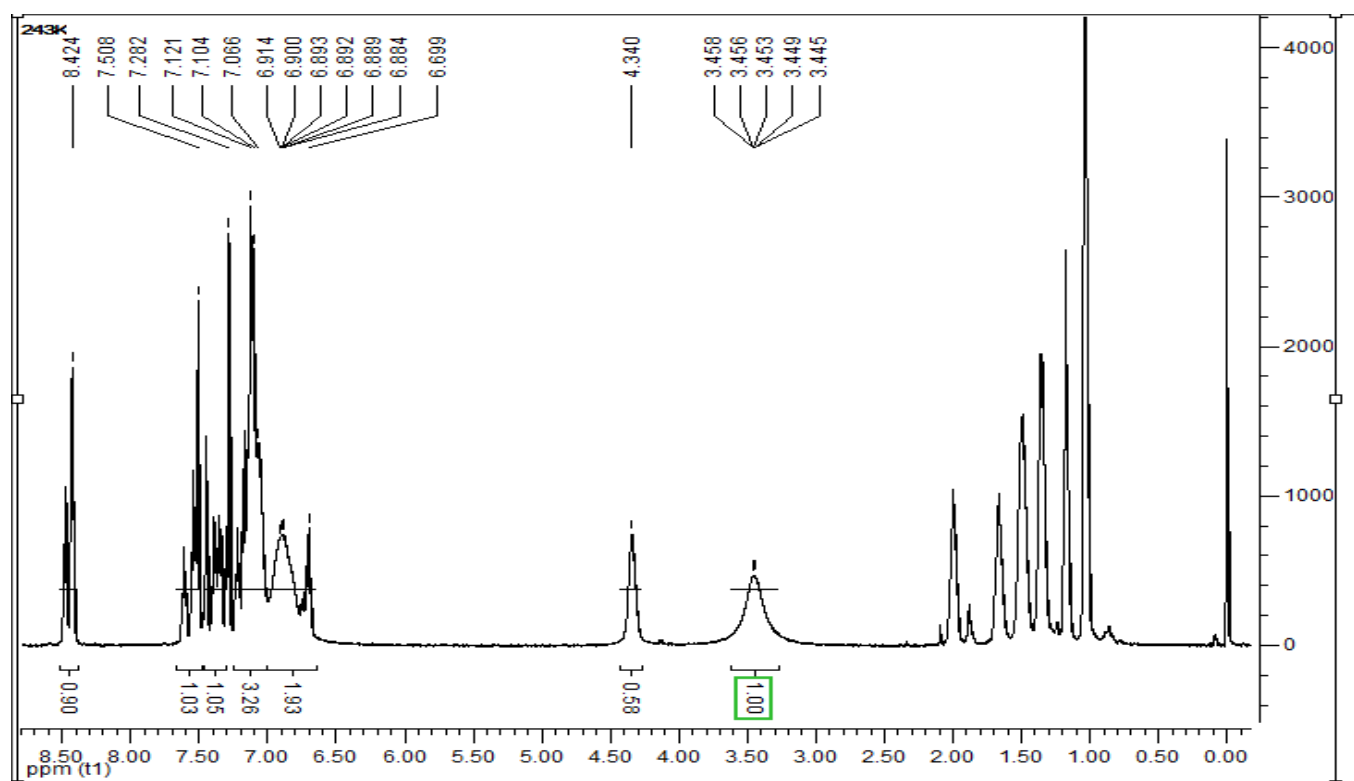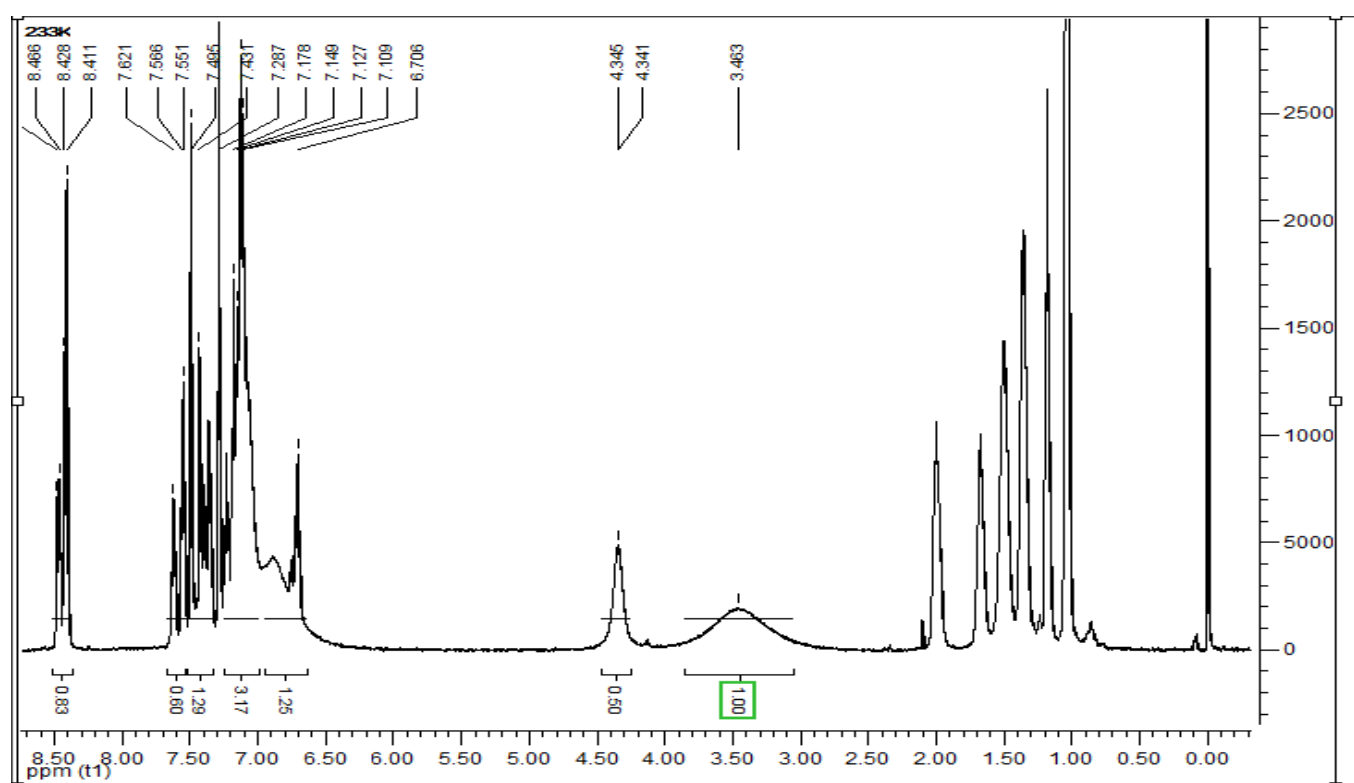

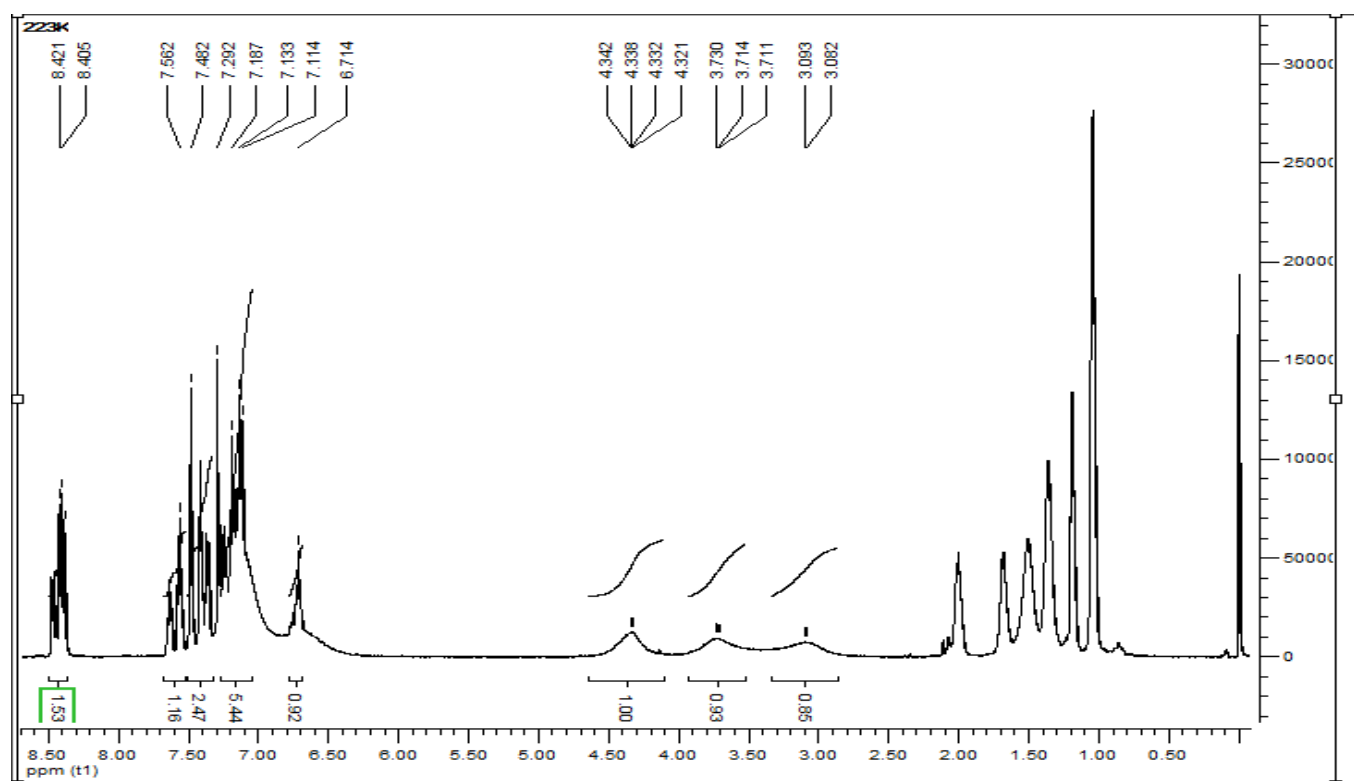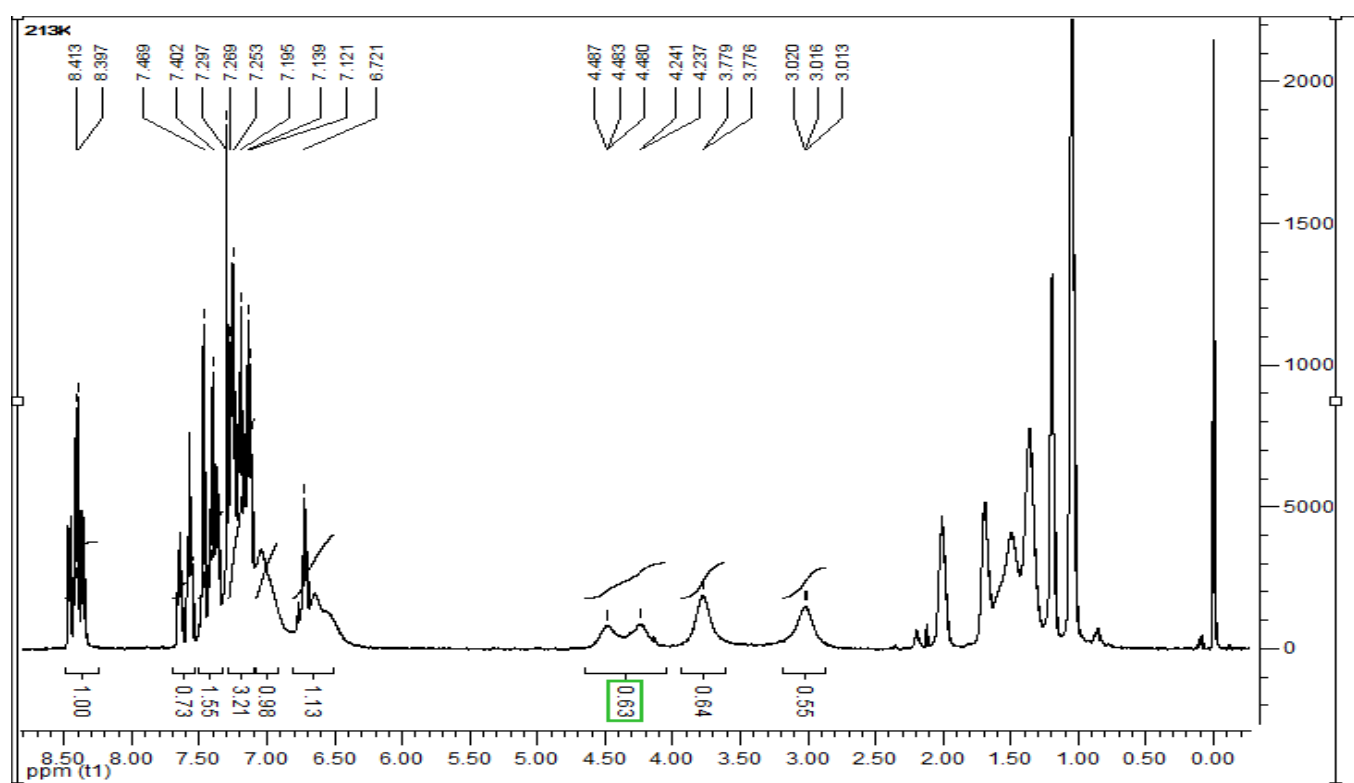

### Variable temperature $^1\text{H}$ NMR (298-335K) of 2

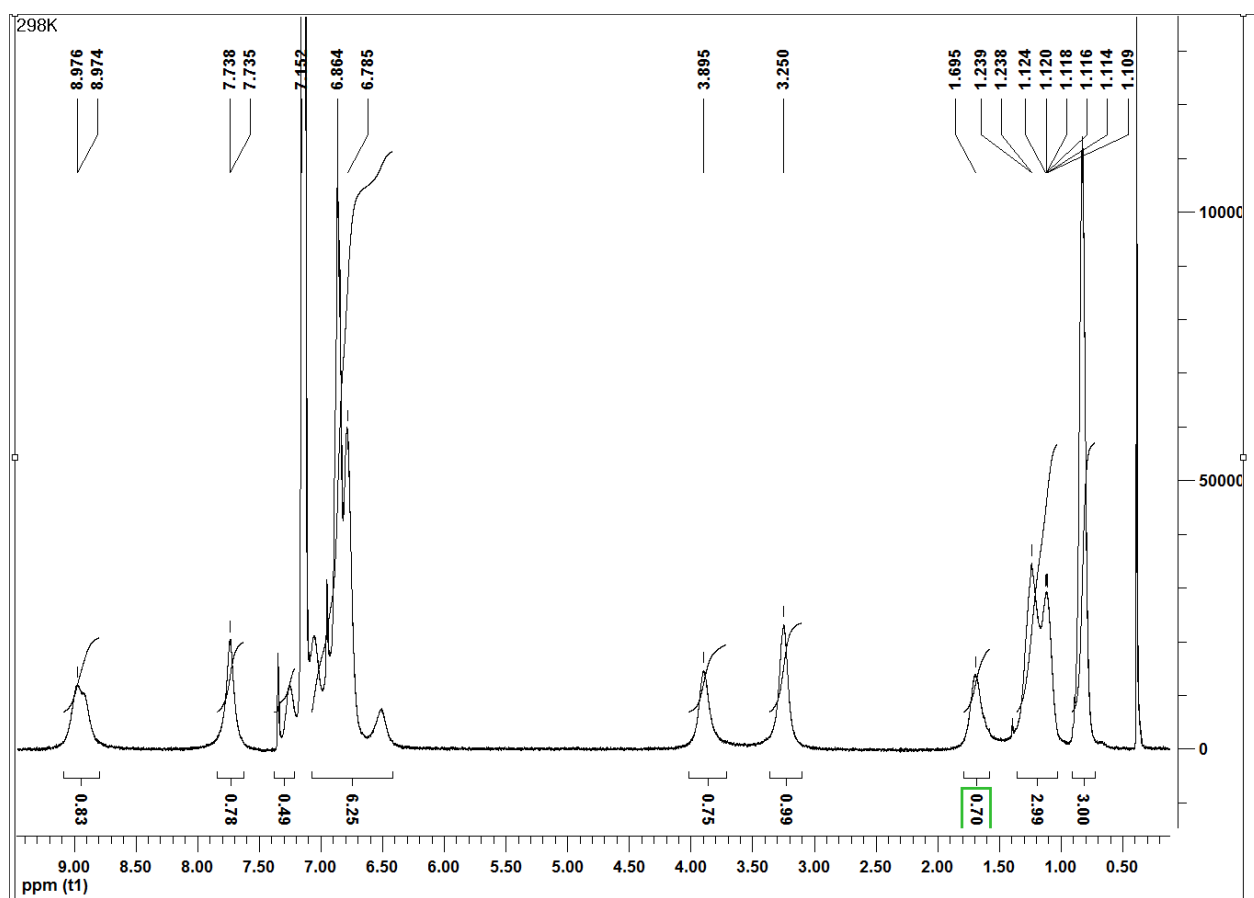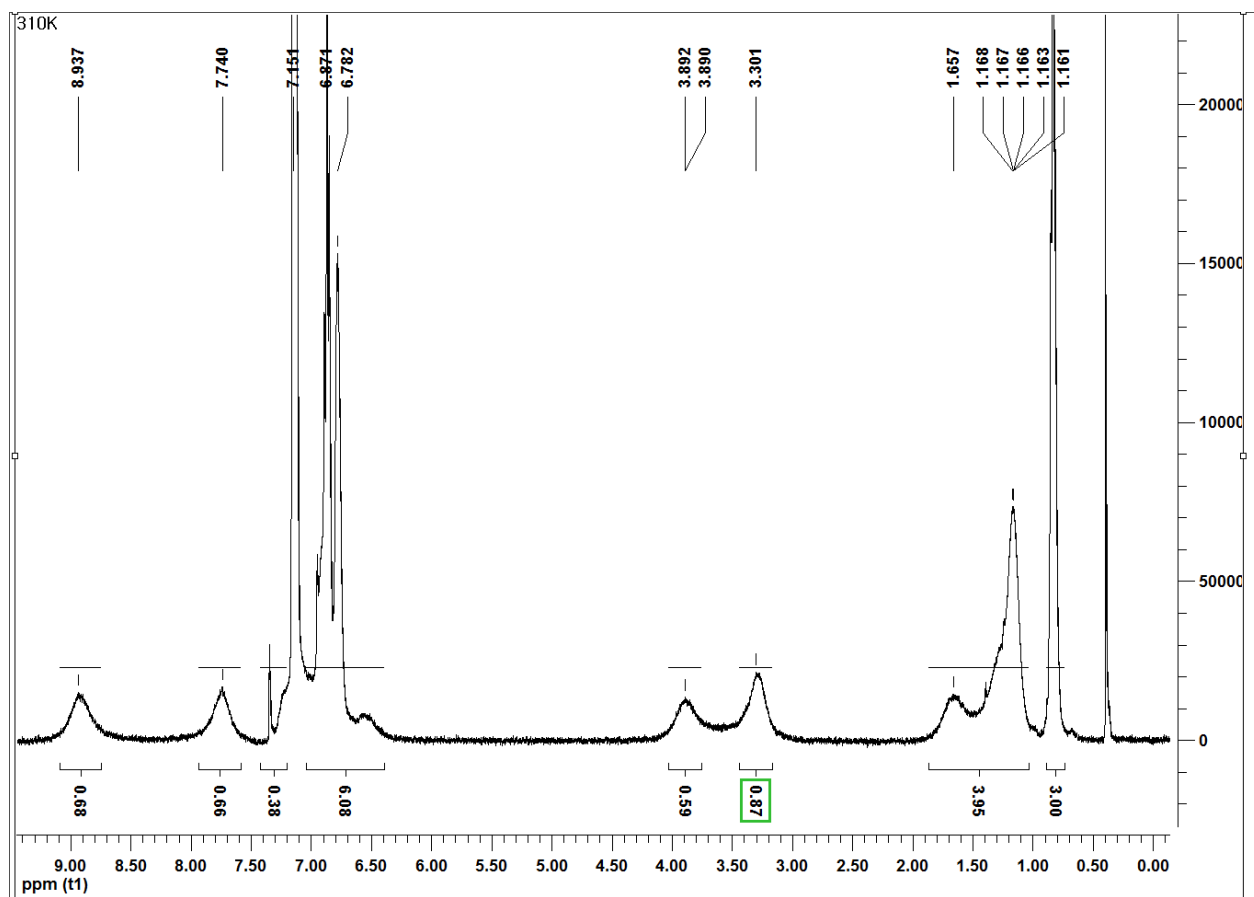

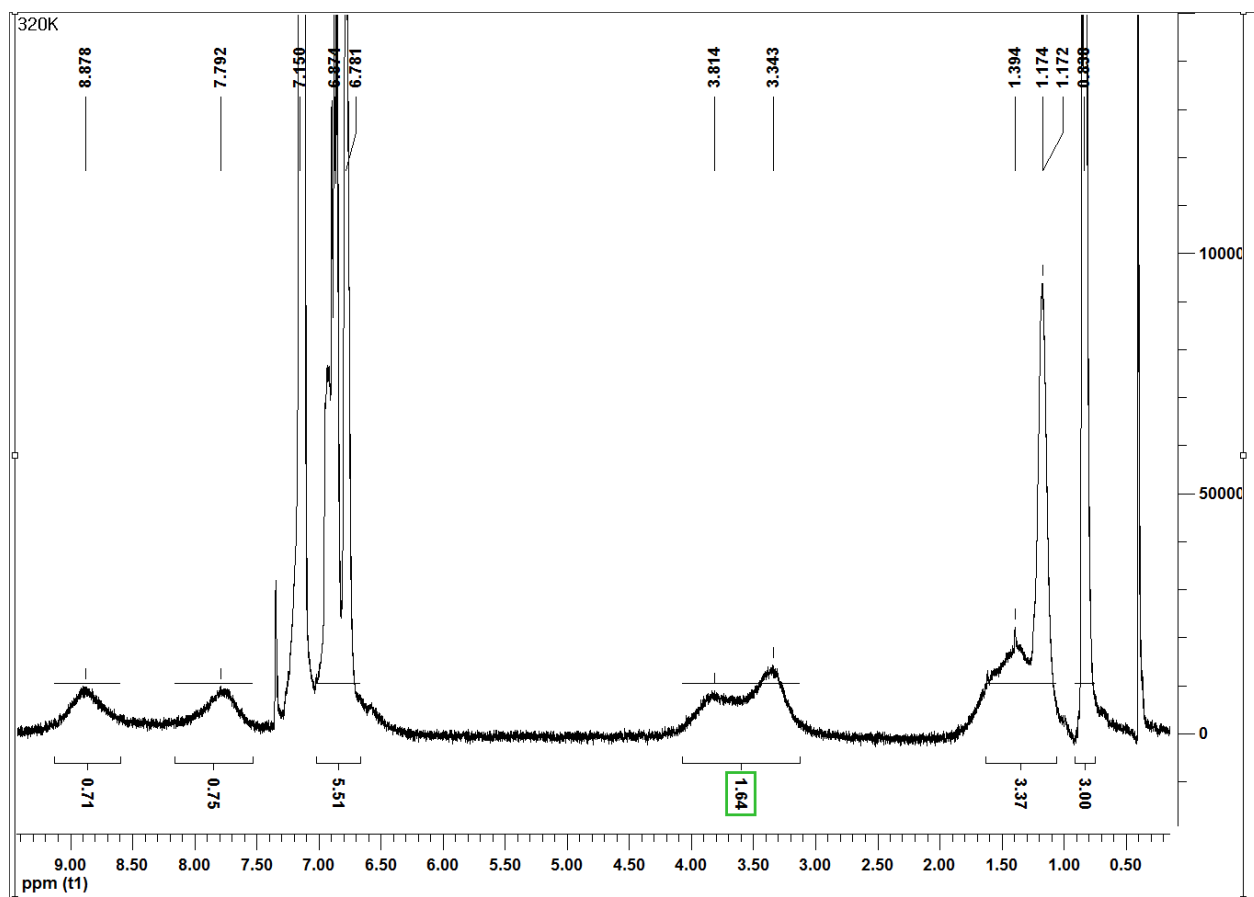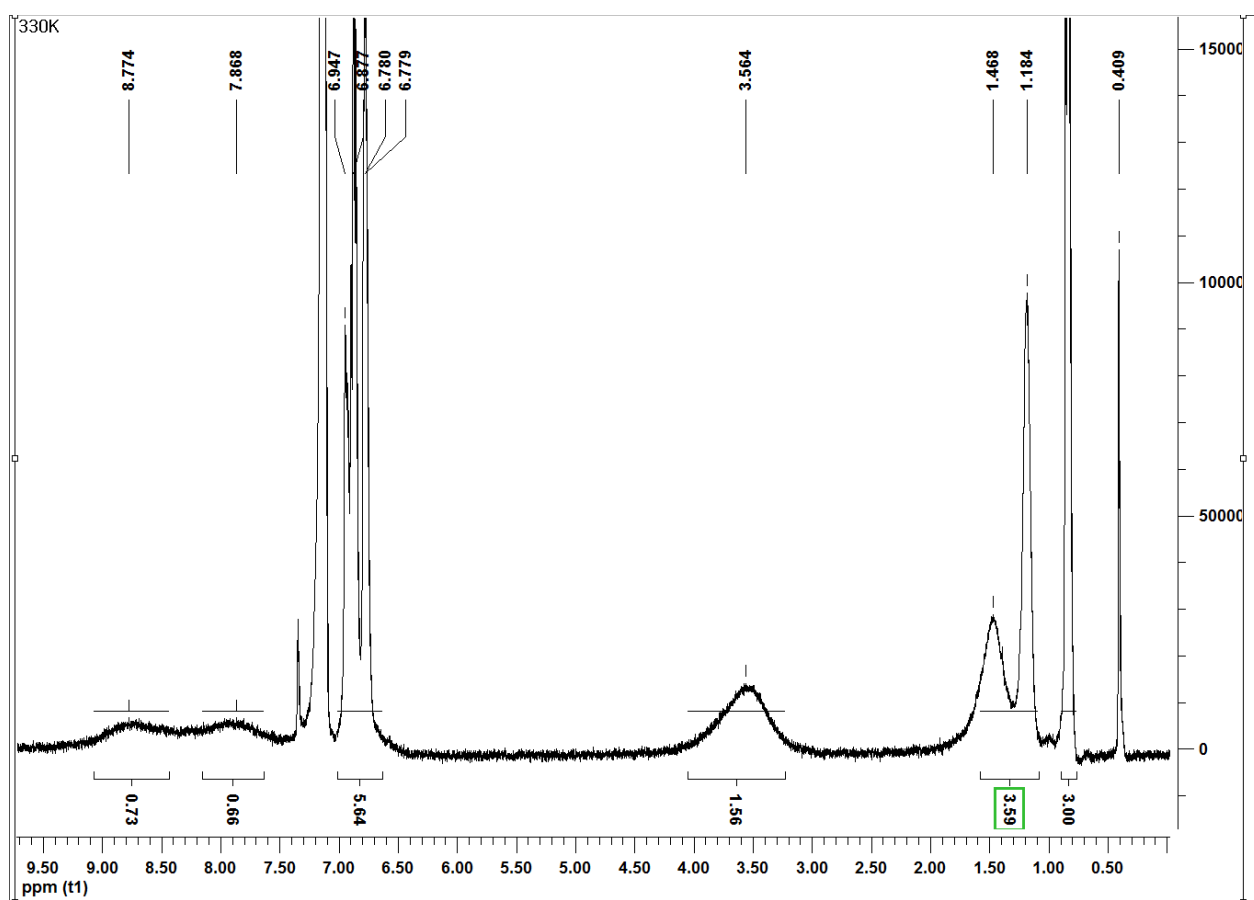

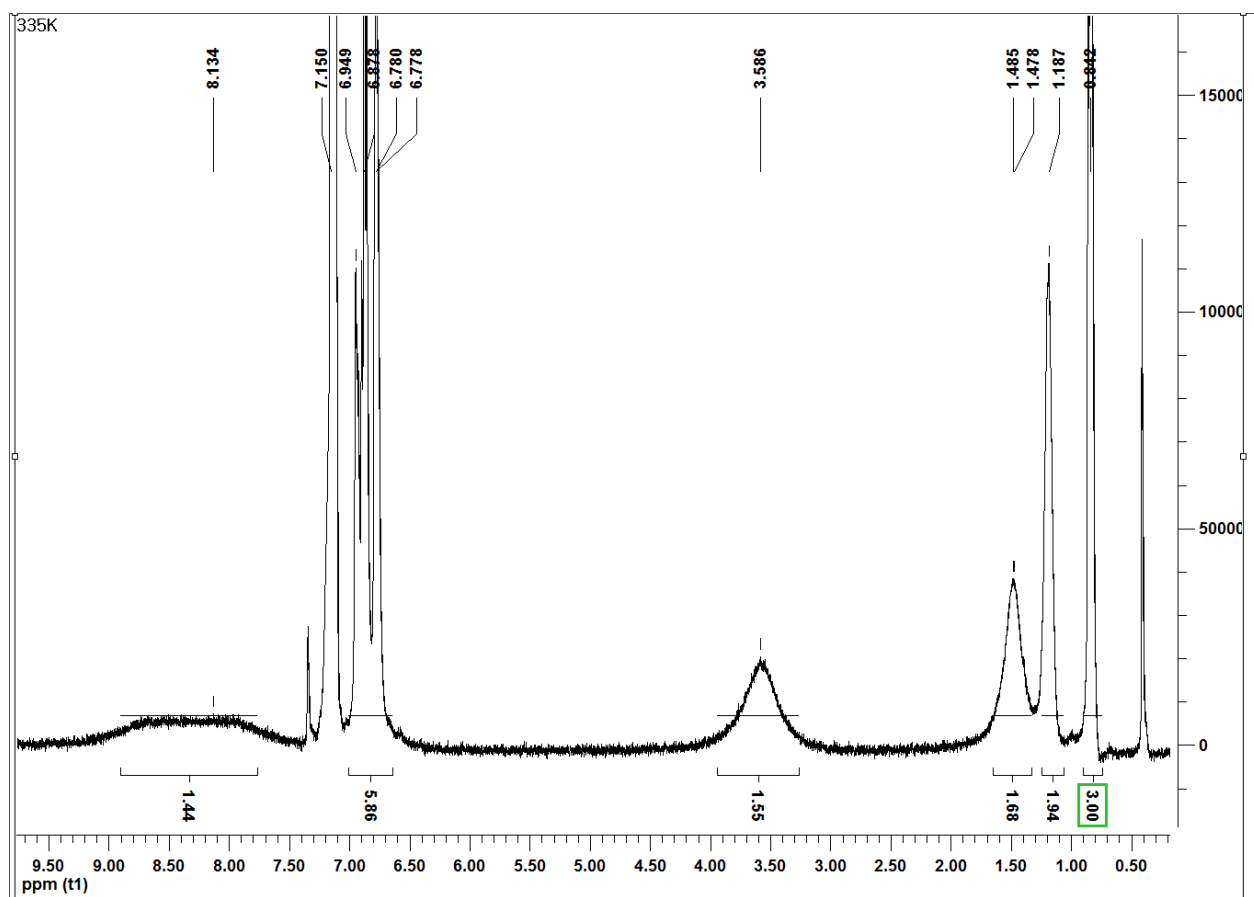

Variable temperature  $^1\text{H}$ NMR (230K-298K) of 7

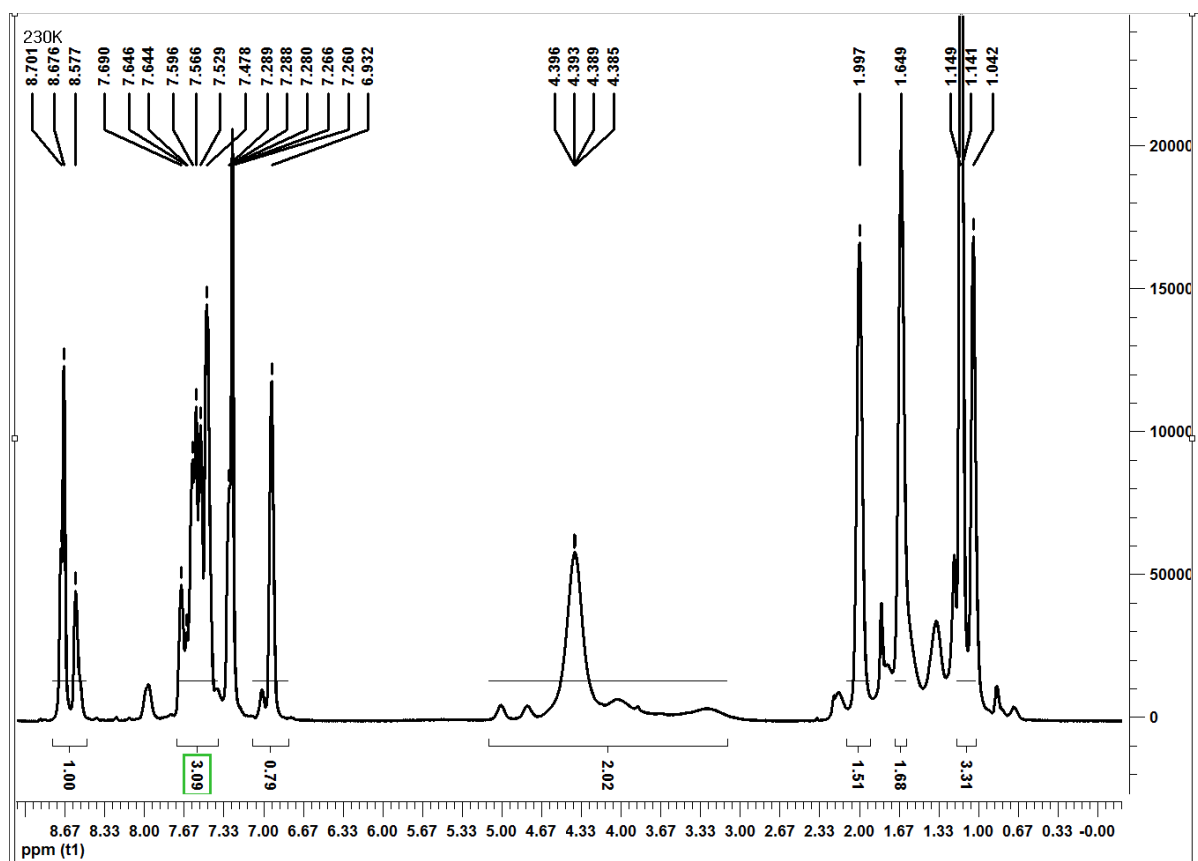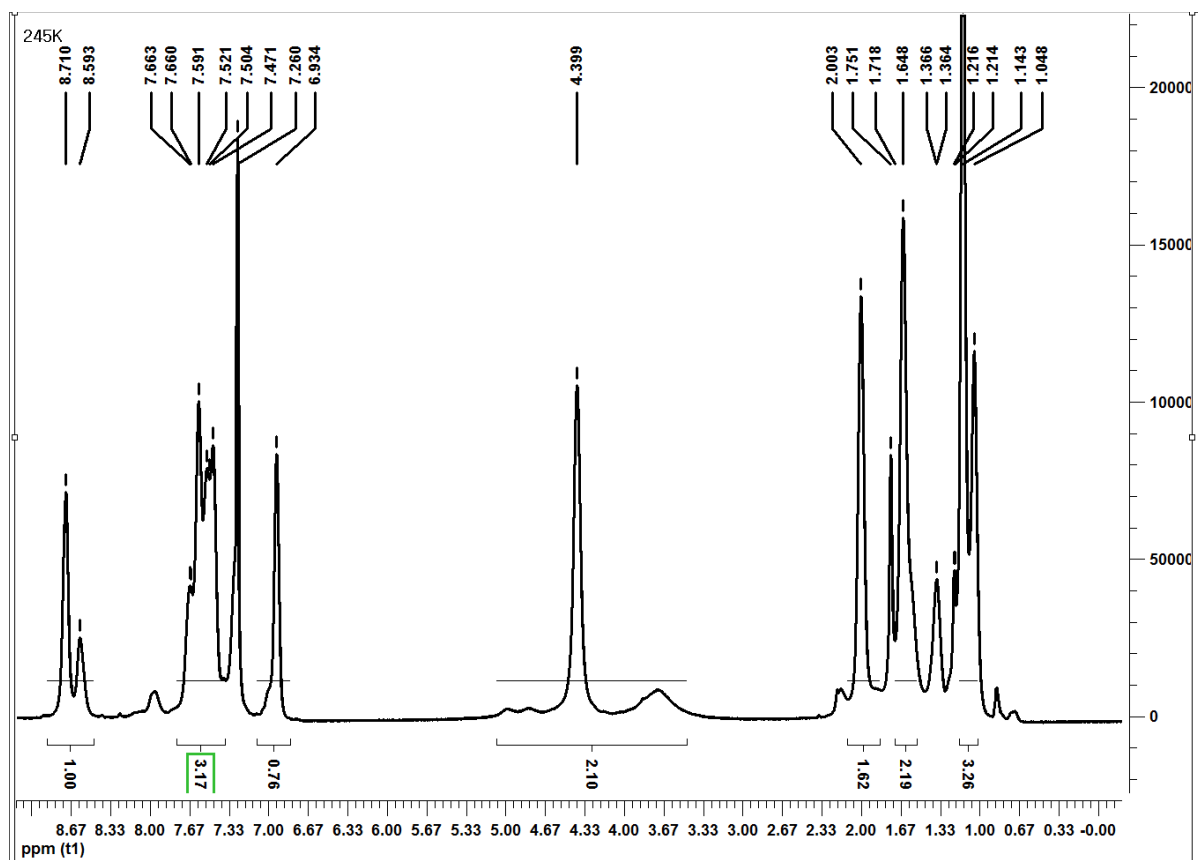



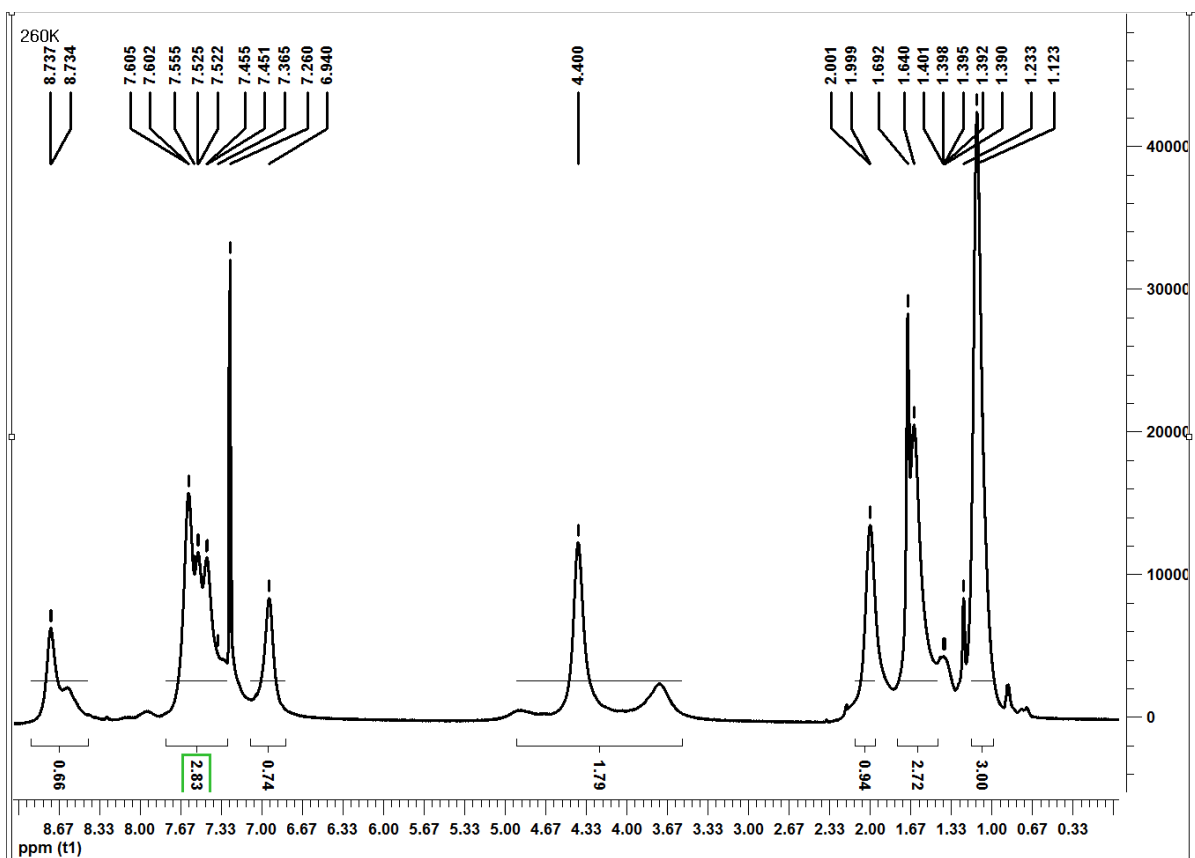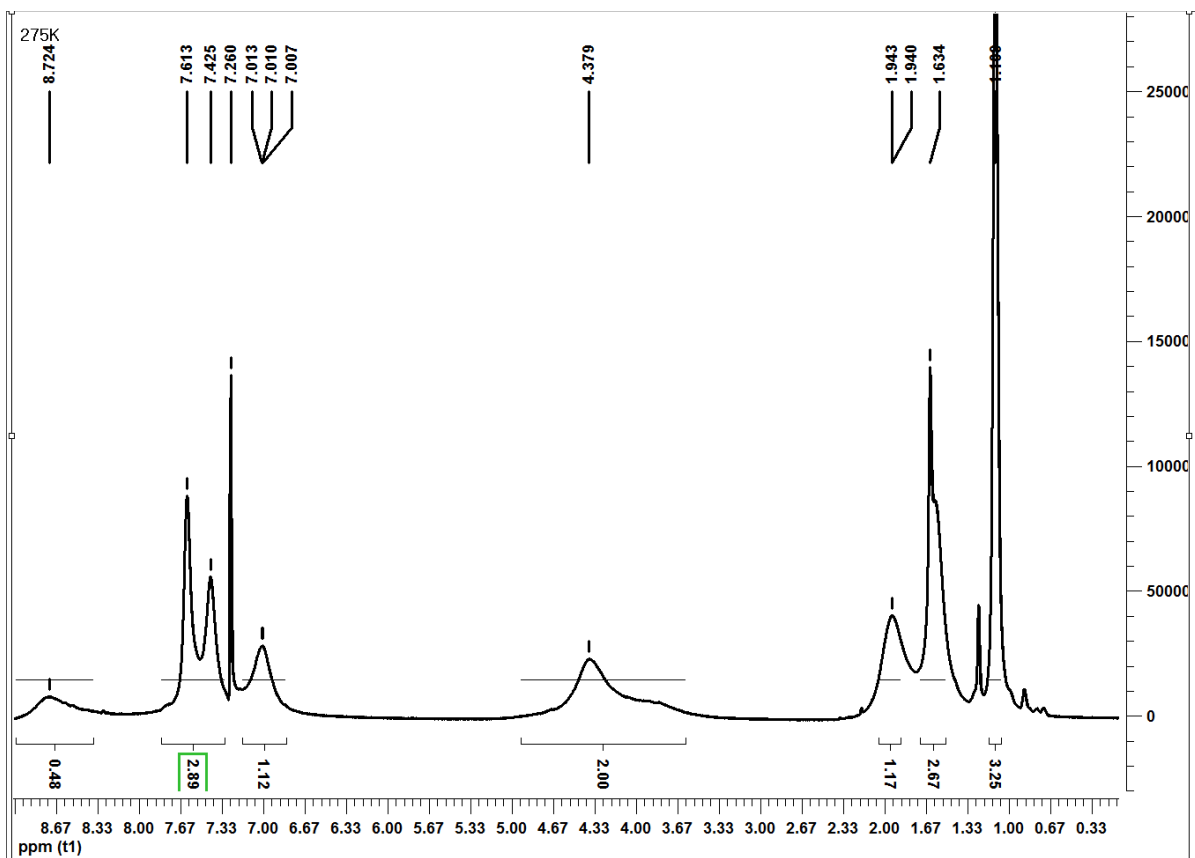

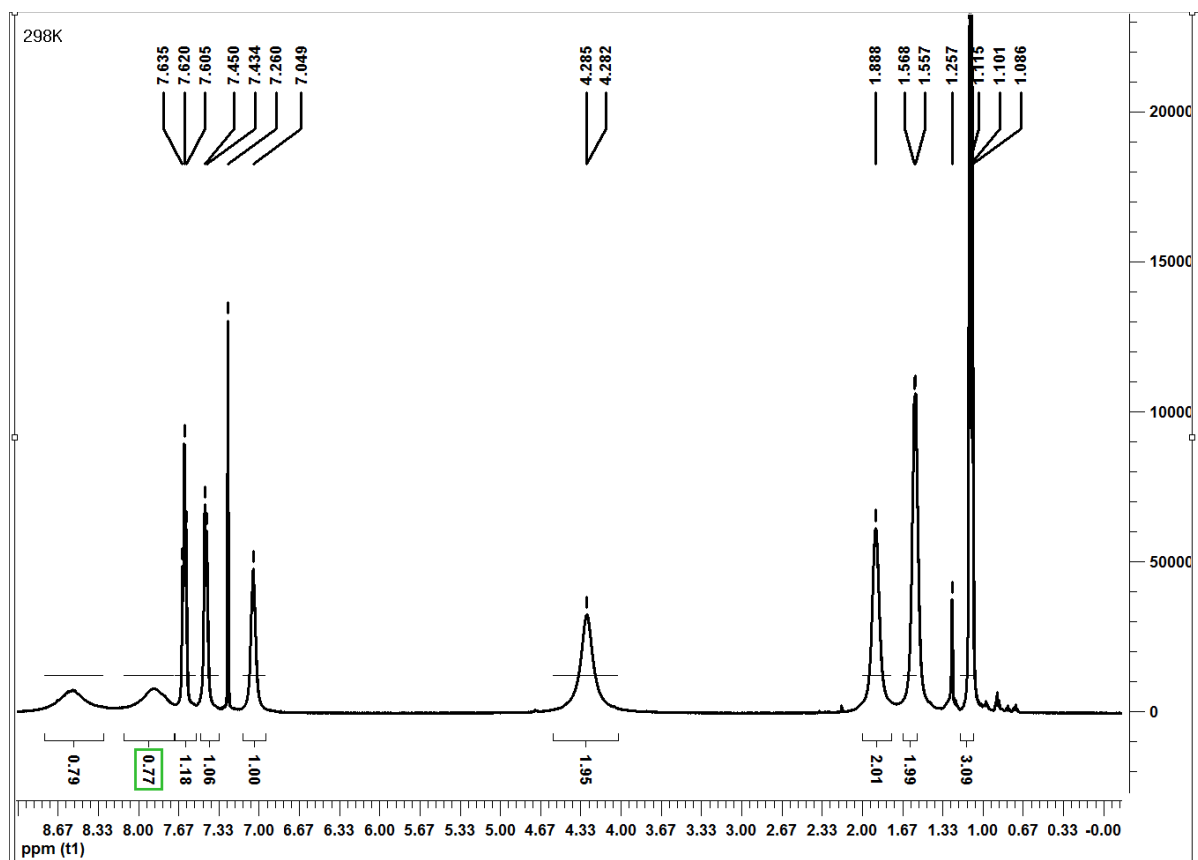

### Variable temperature $^1\text{H}$ NMR (230K-298K) of **10**

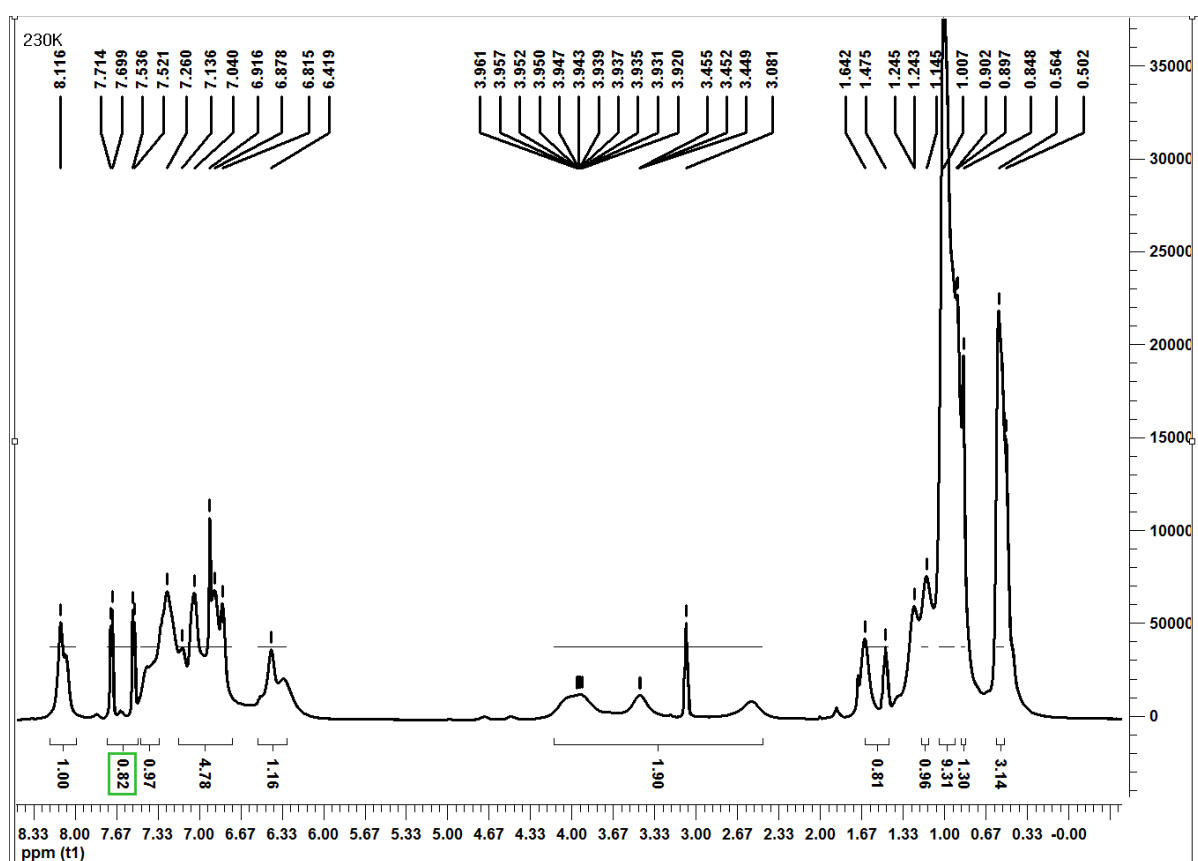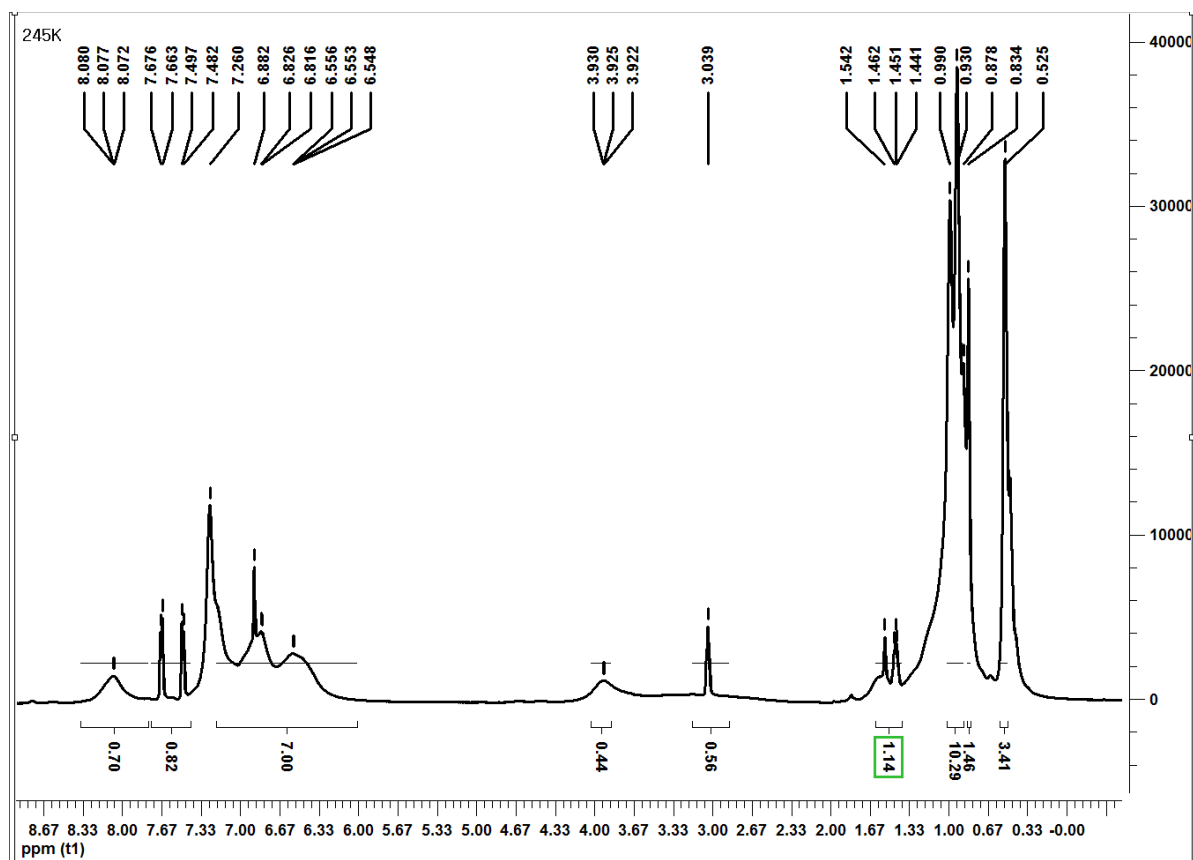

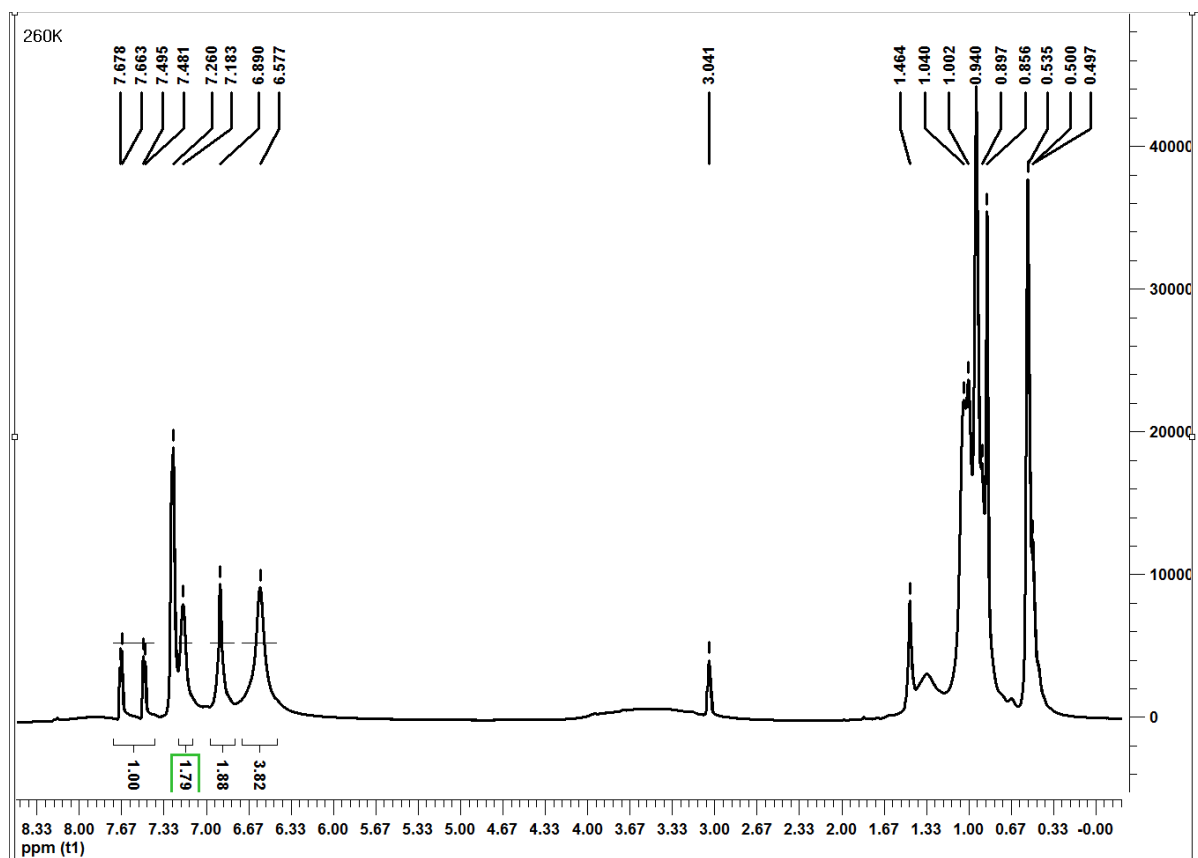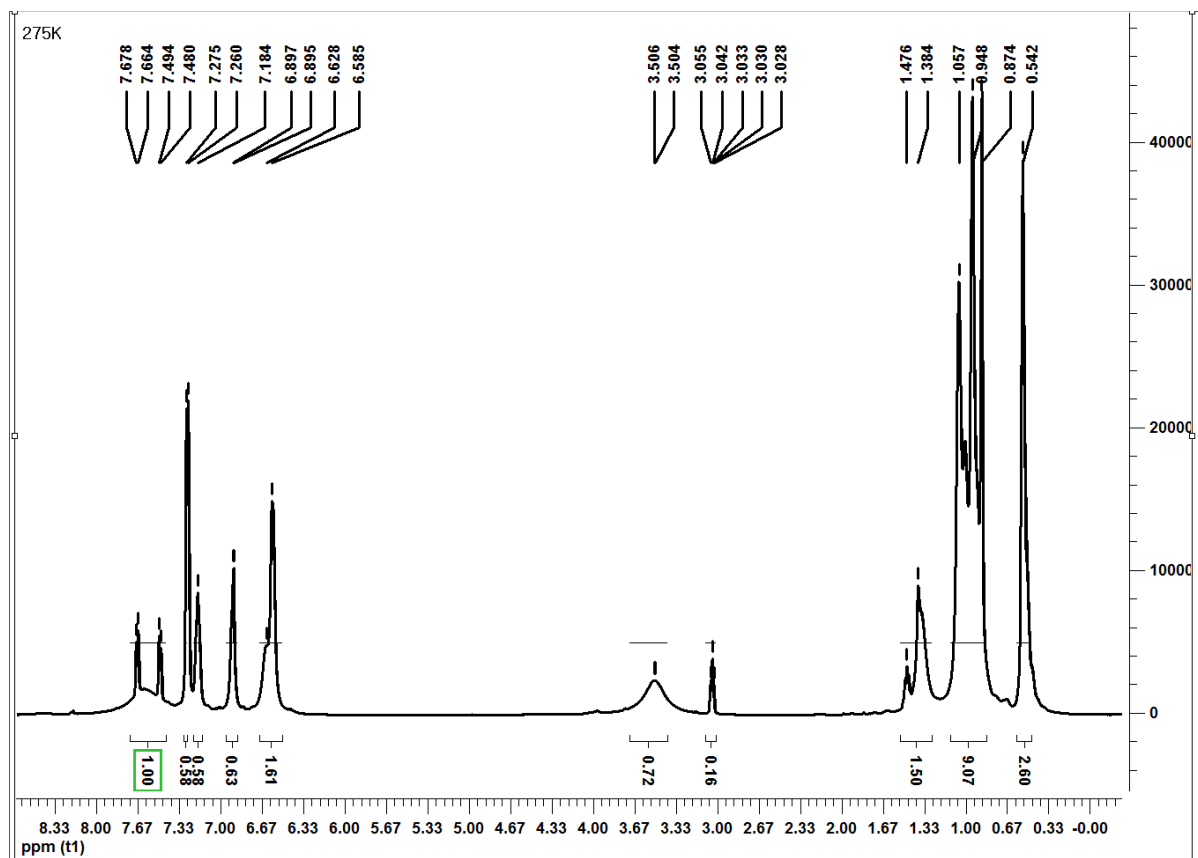

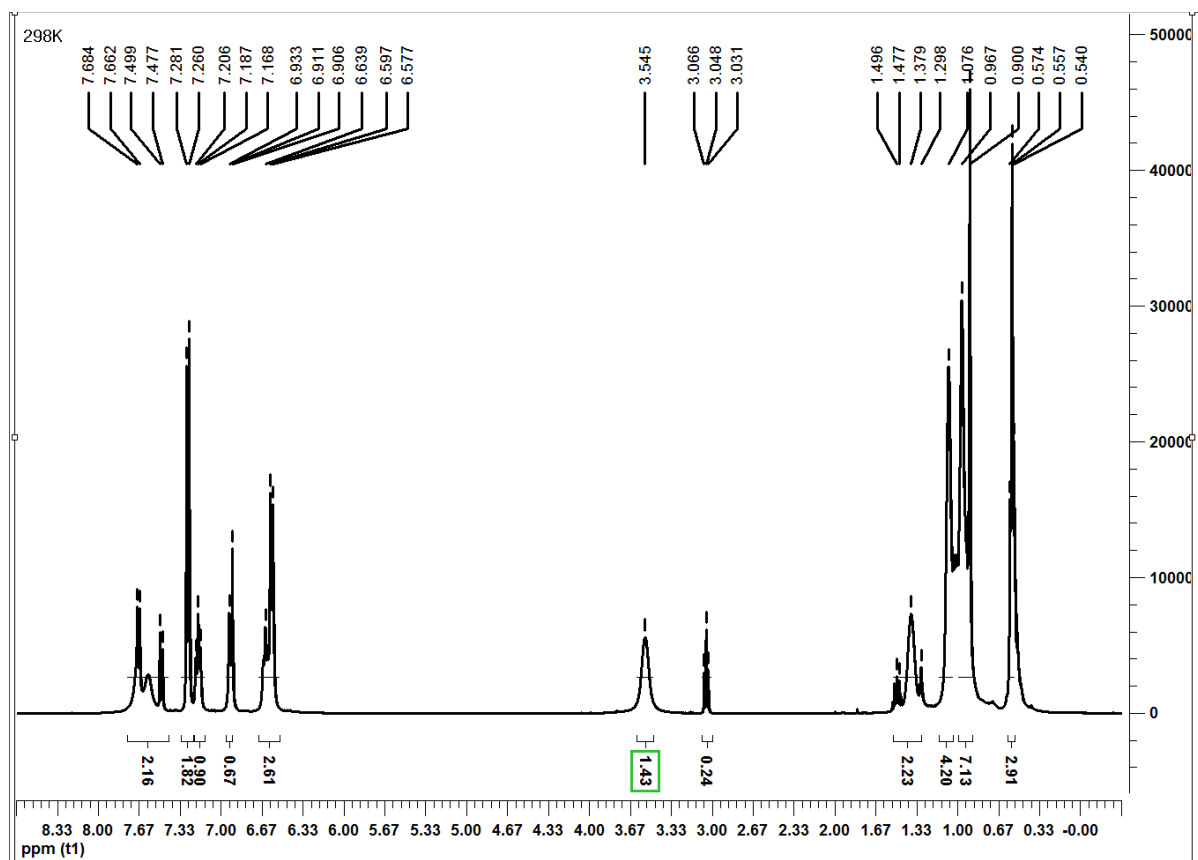

### Variable high temperature $^1\text{H}$ NMR (298K-338K) of 7

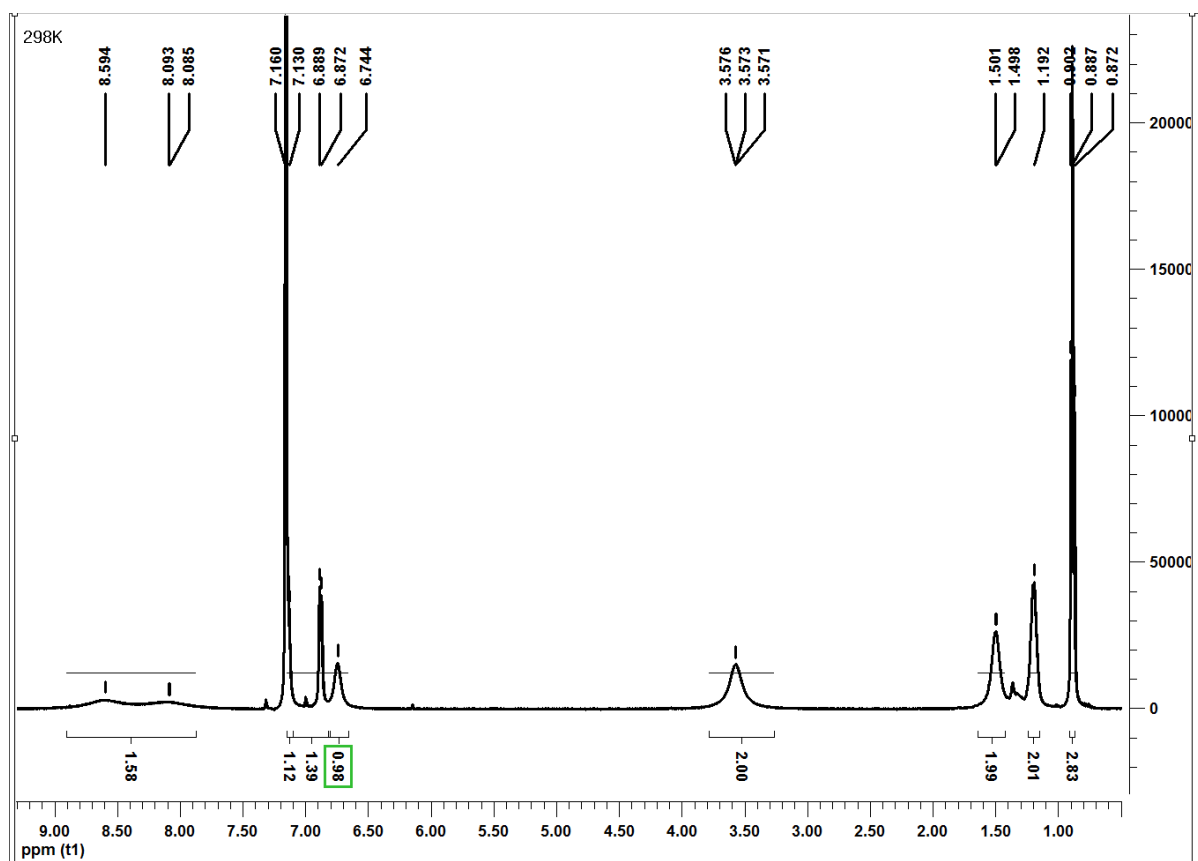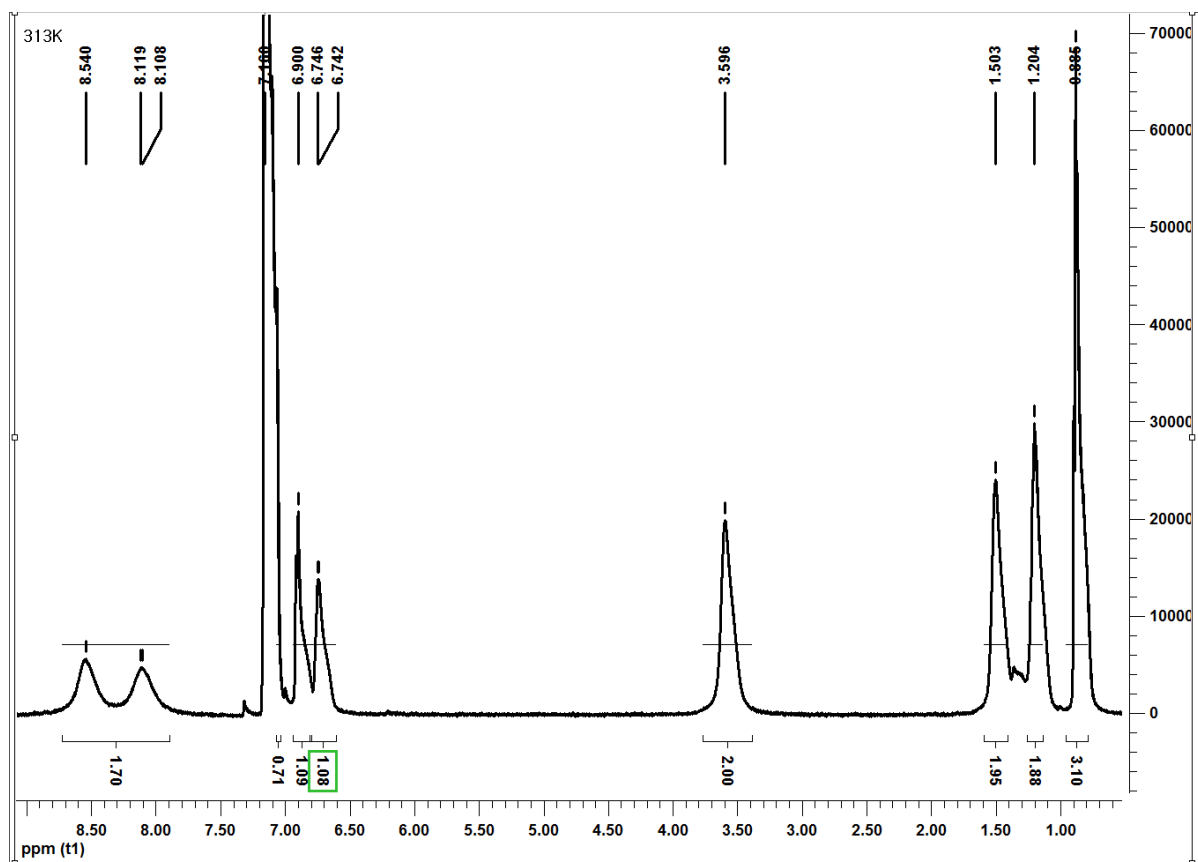

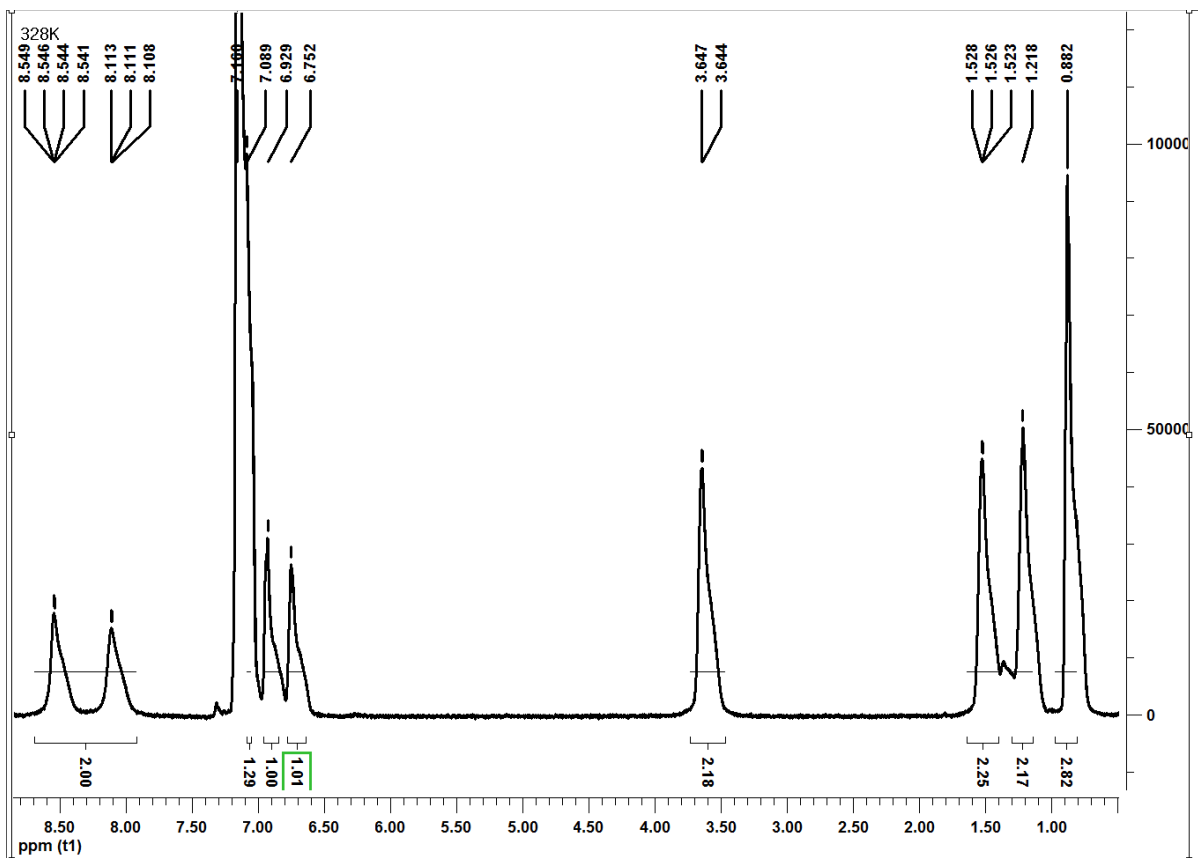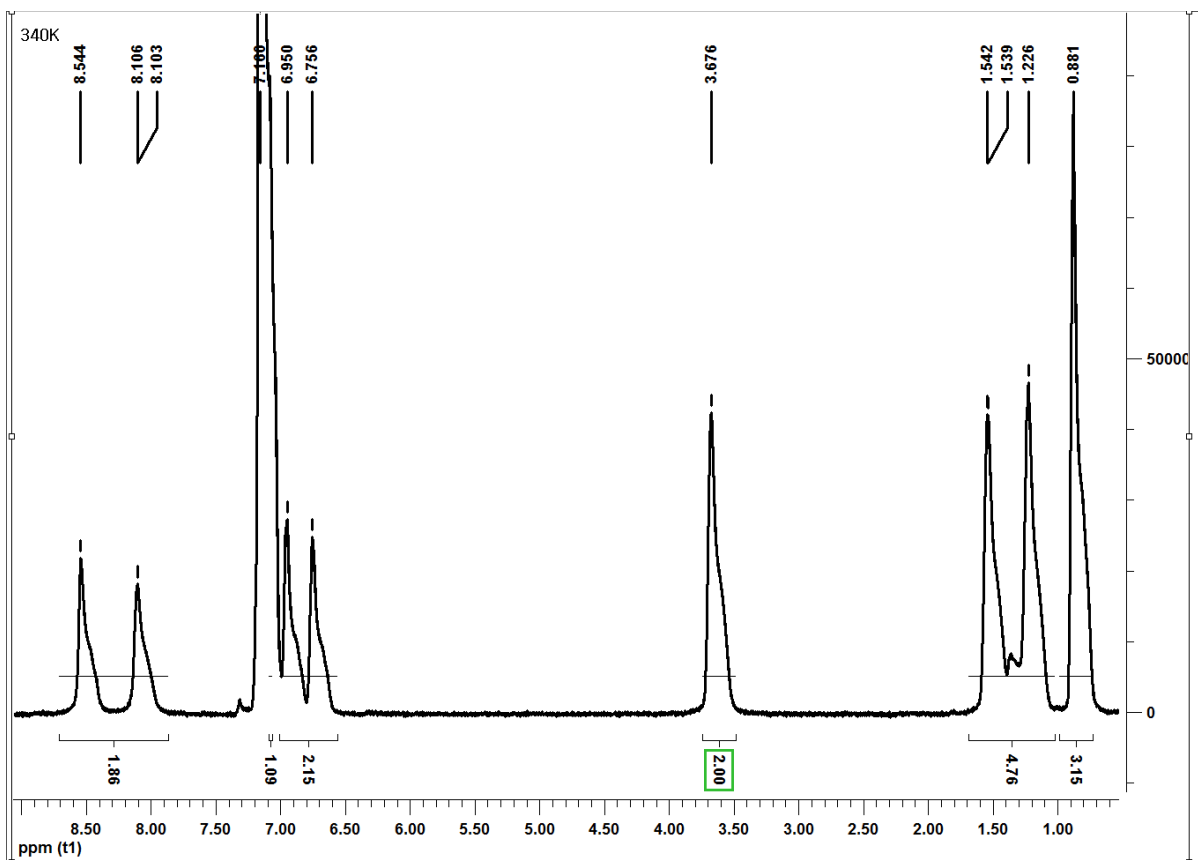

$^{13}\text{C}$ NMR compound 7

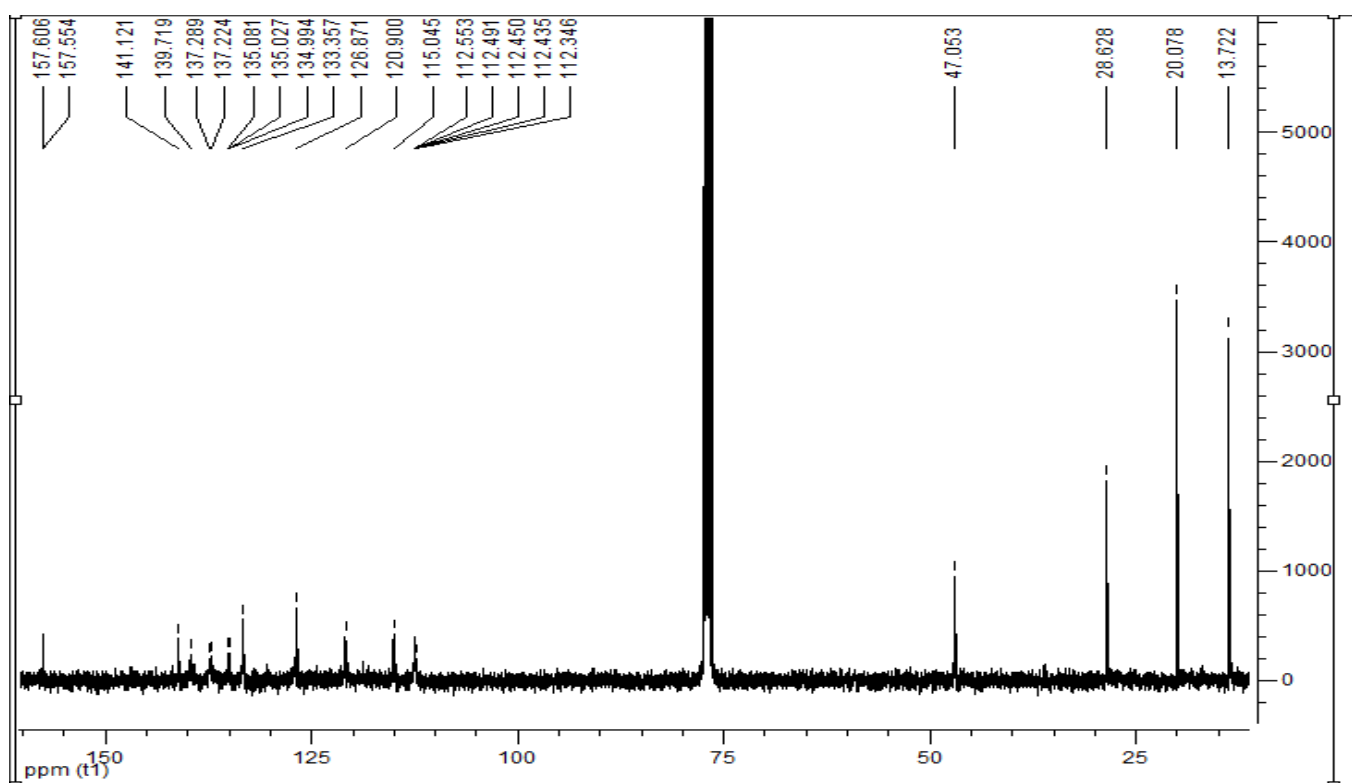

$^{13}\text{C}$ NMR compound 10

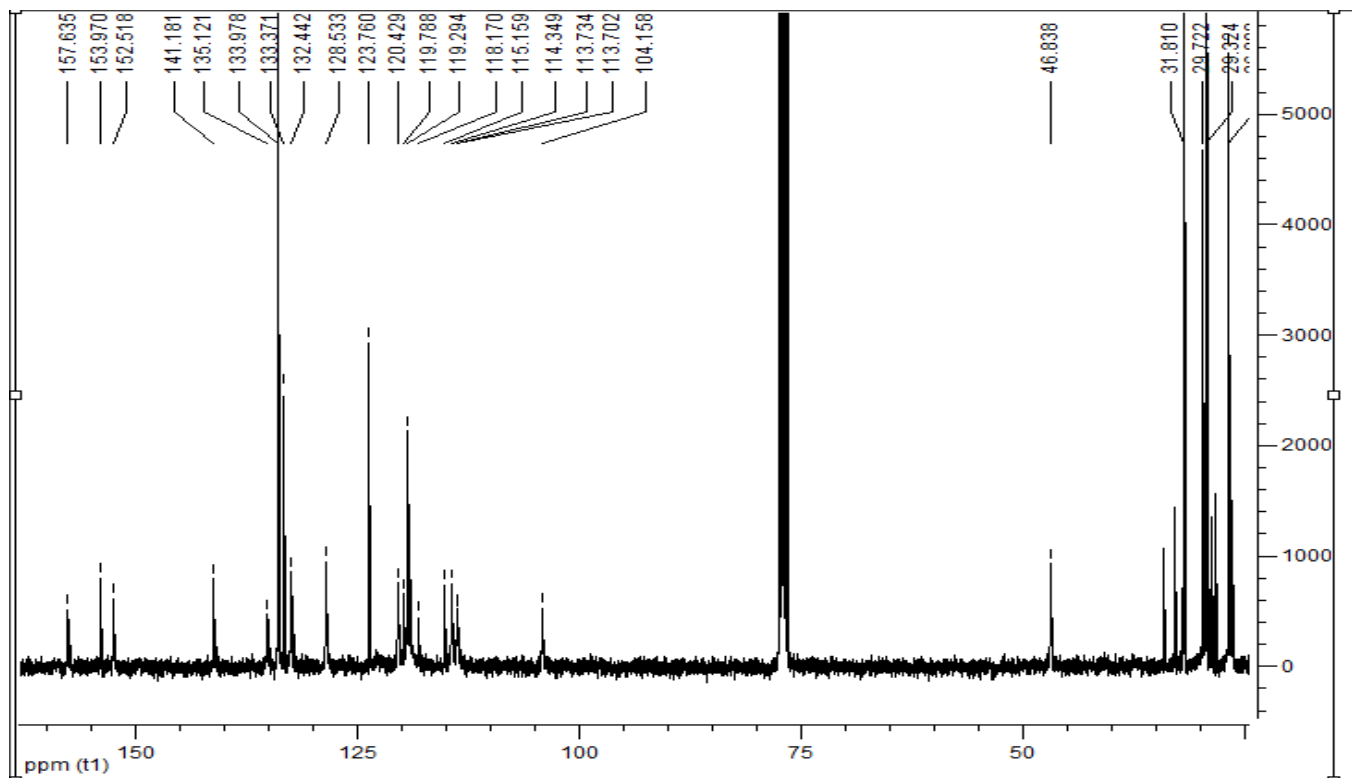



### S1: Crystal Data of Compounds 2, 3, 6, 7, 8 and 10

**Crystal data: 2**,  $C_{40}H_{36}N_4F_2$ ,  $M = 610.73 \text{ g.mol}^{-1}$ , red needles, 0.15, 0.13, 0.10 mm<sup>3</sup>, Triclinic, space group  $P -1$ ,  $a = 7.1105(14)$ ,  $b = 9.868(2)$ ,  $c = 12.576(3) \text{ \AA}$ ,  $\alpha = 73.23(3)^\circ$ ,  $\beta = 78.56(3)^\circ$ ,  $\gamma = 70.79(3)^\circ$ ,  $V = 792.76(3) \text{ \AA}^3$ ,  $Z = 1$ ,  $D_c = 1.28 \text{ g.cm}^{-3}$ ,  $F000 = 322$ , MoK $\alpha$  radiation,  $\lambda = 0.71073 \text{ \AA}$ ,  $T = 263 (2) \text{ K}$ ,  $2\theta_{max} = 55.0^\circ$ , 7761 reflection collected, 3580 unique ( $R_{int} = 0.022$ ), Final  $Goof = 1.084$ ,  $R1 = 0.046$ ,  $wR_2 = 0.130$ ,  $R$  indices based on 2728 reflections with  $I > 2\sigma(I)$  (refinement on  $F^2$ ) 209 parameters,  $\mu = 0.084 \text{ mm}^{-1}$ .

**Crystal data: 3**,  $C_{40}H_{36}N_4F_2 \cdot CH_2Cl_2$ ,  $M = 695.65 \text{ g.mol}^{-1}$ , red needles, 0.14, 0.12, 0.12 mm<sup>3</sup>, Triclinic, space group  $P -1$ ,  $a = 8.602(5)$ ,  $b = 13.889(8)$ ,  $c = 15.854(1) \text{ \AA}$ ,  $\alpha = 70.40(2)^\circ$ ,  $\beta = 79.41(2)^\circ$ ,  $\gamma = 88.92(2)^\circ$ ,  $V = 1752.1(2) \text{ \AA}^3$ ,  $Z = 2$ ,  $D_c = 1.32 \text{ g.cm}^{-3}$ ,  $F000 = 728$ , MoK $\alpha$  radiation,  $\lambda = 0.71073 \text{ \AA}$ ,  $T = 263 (2) \text{ K}$ ,  $2\theta_{max} = 50.0^\circ$ , 13676 reflection collected, 6111 unique ( $R_{int} = 0.026$ ), Final  $Goof = 0.963$ ,  $R1 = 0.063$ ,  $wR_2 = 0.221$ ,  $R$  indices based on 3853 reflections with  $I > 2\sigma(I)$  (refinement on  $F^2$ ) 460 parameters,  $\mu = 0.232 \text{ mm}^{-1}$ .

**Crystal data: 6**,  $C_{44}H_{44}N_4F_2$ ,  $M = 666.83 \text{ g.mol}^{-1}$ , red needles, 0.12, 0.11, 0.10 mm<sup>3</sup>, Triclinic, space group  $P -1$ ,  $a = 8.778(5)$ ,  $b = 9.171(6)$ ,  $c = 13.365(8) \text{ \AA}$ ,  $\alpha = 71.67(3)^\circ$ ,  $\beta = 72.14(2)^\circ$ ,  $\gamma = 62.81(3)^\circ$ ,  $V = 891.3(1) \text{ \AA}^3$ ,  $Z = 1$ ,  $D_c = 1.24 \text{ g.cm}^{-3}$ ,  $F000 = 354$ , MoK $\alpha$  radiation,  $\lambda = 0.71073 \text{ \AA}$ ,  $T = 263 (2) \text{ K}$ ,  $2\theta_{max} = 55.0^\circ$ , 8855 reflection collected, 4050 unique ( $R_{int} = 0.027$ ), Final  $Goof = 1.06$ ,  $R1 = 0.055$ ,  $wR_2 = 0.160$ ,  $R$  indices based on 2788 reflections with  $I > 2\sigma(I)$  (refinement on  $F^2$ ) 237 parameters,  $\mu = 0.080 \text{ mm}^{-1}$ .

**Crystal data: 7**,  $C_{40}H_{28}N_4F_{10}$ ,  $M = 754.66 \text{ g.mol}^{-1}$ , red needles, 0.15, 0.13, 0.10 mm<sup>3</sup>, Triclinic, space group  $P -1$ ,  $a = 7.3925(2)$ ,  $b = 9.2554(2)$ ,  $c = 12.899(3) \text{ \AA}$ ,  $\alpha = 88.42(3)^\circ$ ,  $\beta = 75.51(3)^\circ$ ,  $\gamma = 87.38(3)^\circ$ ,  $V = 853.5(3) \text{ \AA}^3$ ,  $Z = 1$ ,  $D_c = 1.47 \text{ g.cm}^{-3}$ ,  $F000 = 386$ , MoK $\alpha$  radiation,  $\lambda = 0.71073 \text{ \AA}$ ,  $T = 263 (2) \text{ K}$ ,  $2\theta_{max} = 50^\circ$ , 6758 reflection collected, 2979 unique ( $R_{int} = 0.023$ ), Final  $Goof = 1.05$ ,

$R_1 = 0.059$ ,  $wR_2 = 0.183$ ,  $R$  indices based on 2039 reflections with  $I > 2\sigma(I)$  (refinement on  $F^2$ ) 245 parameters,  $\mu = 0.125 \text{ mm}^{-1}$ .

**Crystal data: 8**,  $\text{C}_{44}\text{H}_{44}\text{N}_4\text{F}_2$ ,  $M = 666.83 \text{ g.mol}^{-1}$ , **red needles**, 0.12, 0.11, 0.10  $\text{mm}^3$ , Monoclinic, space group  $C 2/c$ ,  $a = 16.453(3)$ ,  $b = 7.222(14)$ ,  $c = 31.554(1) \text{ \AA}$ ,  $\beta = 110.38(3)^\circ$ ,  $V = 3514.7(15) \text{ \AA}^3$ ,  $Z = 4$ ,  $D_c = 1.26 \text{ g.cm}^{-3}$ ,  $F000 = 1416$ , MoK $\alpha$  radiation,  $\lambda = 0.71073 \text{ \AA}$ ,  $T = 173 (2) \text{ K}$ ,  $2\theta_{max} = 50.0^\circ$ , 13280 reflection collected, 3092 unique ( $R_{int} = 0.084$ ), Final  $Goof = 1.028$ ,  $R_1 = 0.064$ ,  $wR_2 = 0.162$ ,  $R$  indices based on 1789 reflections with  $I > 2\sigma(I)$  (refinement on  $F^2$ ) 229 parameters,  $\mu = 0.081 \text{ mm}^{-1}$ .

**Crystal data: 10**,  $\text{C}_{50}\text{H}_{52}\text{N}$ ,  $M = 736.98 \text{ g.mol}^{-1}$ , **red needles**, 0.15, 0.13, 0.10  $\text{mm}^3$ , Triclinic, space group  $P -1$ ,  $a = 8.8472(2)$ ,  $b = 9.2195(2)$ ,  $c = 14.044(3) \text{ \AA}$ ,  $\alpha = 84.46(3)^\circ$ ,  $\beta = 76.26(3)^\circ$ ,  $\gamma = 64.35(3)^\circ$ ,  $V = 1003.1(3) \text{ \AA}^3$ ,  $Z = 1$ ,  $D_c = 1.22 \text{ g.cm}^{-3}$ ,  $F000 = 394$ , MoK $\alpha$  radiation,  $\lambda = 0.71073 \text{ \AA}$ ,  $T = 263 (2) \text{ K}$ ,  $2\theta_{max} = 55.0^\circ$ , 9921 reflection collected, 4544 unique ( $R_{int} = 0.070$ ), Final  $Goof = 0.988$ ,  $R_1 = 0.066$ ,  $wR_2 = 0.158$ ,  $R$  indices based on 2000 reflections with  $I > 2\sigma(I)$  (refinement on  $F^2$ ) 254 parameters,  $\mu = 0.072 \text{ mm}^{-1}$ .

**Table.1.** Reaction conditions for compounds **2-10**

| Product            | Reactant A<br>(mmoles) | Reactant B<br>(mmoles)           | TEA<br>(mmoles) | TiCl <sub>4</sub><br>(mmoles) | Yield<br>(%) |
|--------------------|------------------------|----------------------------------|-----------------|-------------------------------|--------------|
| Compound <b>2</b>  | DBQA (1)               | P-Fluoroaniline (4)              | 8.5             | 5.4                           | 85           |
| Compound <b>3</b>  | DFDBQA (1)             | Aniline (4)                      | 8.5             | 5.4                           | 70           |
| Compound <b>4</b>  | DFDBQA (1)             | P-Fluoroaniline (4)              | 8.5             | 5.4                           | 66           |
| Compound <b>5</b>  | TMDBQA (1)             | Aniline (4)                      | 8.5             | 5.4                           | 63           |
| Compound <b>6</b>  | TMDBQA (1)             | P-Fluoroaniline (4)              | 8.5             | 5.4                           | 51           |
| Compound <b>7</b>  | DBQA (1)               | 2,3,4,5,6-pentafluoroaniline (4) | 8.5             | 5.4                           | 55           |
| Compound <b>8</b>  | DFDBQA (1)             | dimethylaniline (4)              | 8.5             | 5.4                           | 45           |
| Compound <b>9</b>  | DBQA (1)               | Naphthylamine (4)                | 8.5             | 5.4                           | 40           |
| Compound <b>10</b> | 8CQA (1)               | p-Cyanoaniline (4)               | 8.5             | 5.4                           | 60           |

**Table.2.** Photophysical properties of compounds **1-10**

| Compound | Chloroform<br>$\lambda_{\max}$ (nm) | Toluene<br>$\lambda_{\max}$ (nm) | Acetone<br>$\lambda_{\max}$ (nm) | Thin film<br>$\lambda_{\max}$ (nm) |
|----------|-------------------------------------|----------------------------------|----------------------------------|------------------------------------|
| 1        | 519                                 | 518                              | 514                              | 527                                |
| 2        | 520                                 | 518                              | 515                              | 528                                |
| 3        | 535                                 | 532                              | 529                              | 541                                |
| 4        | 536                                 | 534                              | 530                              | 545                                |
| 5        | 498                                 | 497                              | 492                              | 503                                |
| 6        | 500                                 | 499                              | 494                              | 512                                |
| 7        | 540                                 | 542                              | 540                              | 554                                |
| 8        | 534                                 | 532                              | 531                              | 538                                |
| 9        | 525                                 | 524                              | 521                              | 535                                |
| 10       | 532                                 | 529                              | 526                              | 538                                |

**Table.3.** A comparison of eigenvalues of HOMOs and LUMOs of quinacridones **1-10 (A and B)** at three different levels of theory.

| Structure | HOMO  | LUMO  | Gap<br>B3PW91 | HOMO  | LUMO  | Gap<br>B3LYP | HOMO  | LUMO  | Gap<br>PBEPBE | Exp. |
|-----------|-------|-------|---------------|-------|-------|--------------|-------|-------|---------------|------|
| 1a        | -4.98 | -1.99 | 2.99          | -5.15 | -2.21 | 2.94         | -4.27 | -2.47 | 1.80          | 2.26 |
| 2a        | -5.06 | -2.11 | 2.95          | -5.25 | -2.35 | 2.90         | -4.31 | -2.55 | 1.76          | 2.27 |
| 3a        | -5.06 | -2.17 | 2.89          | -5.26 | -2.41 | 2.85         | -4.33 | -2.61 | 1.72          | 2.22 |
| 4a        | -5.14 | -2.28 | 2.86          | -5.36 | -2.54 | 2.82         | -4.37 | -2.69 | 1.68          | 2.20 |
| 5a        | -4.81 | -1.83 | 2.98          | -4.97 | -2.04 | 2.93         | -4.10 | -2.30 | 1.80          | 2.32 |
| 6a        | -4.88 | -1.92 | 2.96          | -5.07 | -2.15 | 2.92         | -4.14 | -2.36 | 1.78          | 2.38 |
| 7a        | -5.39 | -2.52 | 2.87          | -5.63 | -2.81 | 2.82         | -4.60 | -2.89 | 1.71          | 2.07 |
| 8a        | -5.00 | -2.09 | 2.91          | -5.19 | -2.33 | 2.86         | -4.25 | -2.53 | 1.72          | 2.21 |
| 9a        | -5.07 | -2.05 | 3.02          | -5.24 | -2.26 | 2.98         | -4.31 | -2.54 | 1.77          | 1.99 |
| 10a       | -5.48 | -2.58 | 2.90          | -5.64 | -2.78 | 2.86         | -4.78 | -3.03 | 1.75          | 1.81 |
|           |       |       |               |       |       |              |       |       |               |      |
| 1b        | -5.00 | -2.12 | 2.88          | -5.17 | -2.34 | 2.83         | -4.28 | -2.58 | 1.70          | 2.26 |
| 2b        | -5.08 | -2.22 | 2.86          | -5.28 | -2.45 | 2.83         | -4.32 | -2.65 | 1.67          | 2.27 |
| 3b        | -5.09 | -2.30 | 2.79          | -5.29 | -2.54 | 2.75         | -4.34 | -2.72 | 1.62          | 2.22 |
| 4b        | -5.17 | -2.40 | 2.77          | -5.39 | -2.65 | 2.74         | -4.39 | -2.79 | 1.60          | 2.20 |
| 5b        | -4.89 | -1.89 | 3.00          | -5.05 | -2.09 | 2.96         | -4.16 | -2.36 | 1.80          | 2.32 |
| 6b        | -4.97 | -1.99 | 2.98          | -5.15 | -2.21 | 2.94         | -4.21 | -2.44 | 1.77          | 2.38 |
| 7b        | -5.44 | -2.61 | 2.83          | -5.69 | -2.90 | 2.79         | -4.64 | -2.98 | 1.66          | 2.07 |
| 8b        | -5.02 | -2.34 | 2.68          | -5.21 | -2.47 | 2.74         | -4.26 | -2.65 | 1.61          | 2.21 |
| 9b        | -5.04 | -2.13 | 2.91          | -5.21 | -2.34 | 2.87         | -4.29 | -2.61 | 1.68          | 1.99 |
| 10b       | -5.49 | -2.71 | 2.78          | -5.65 | -2.91 | 2.74         | -4.78 | -3.14 | 1.64          | 1.81 |

**Table .4.** A comparison of eigenvalues of HOMOs and LUMOs of quinacridones **1-10** (A and B), theoretical and experimental

|           | 1A    |       |      | 1B                 |                    |      | Exp.  |       |      |
|-----------|-------|-------|------|--------------------|--------------------|------|-------|-------|------|
| Structure | HOMO  | LUMO  | Gap  | HOMO <sub>Th</sub> | LUMO <sub>Th</sub> | Gap  | HOMO  | LUMO  | Gap  |
| 1         | -4.98 | -1.99 | 2.99 | -5.00              | -2.12              | 2.88 | -5.05 | -2.78 | 2.26 |
| 2         | -5.06 | -2.11 | 2.95 | -5.08              | -2.22              | 2.86 | -5.19 | -2.92 | 2.27 |
| 3         | -5.06 | -2.17 | 2.89 | -5.09              | -2.30              | 2.79 | -5.21 | -2.99 | 2.22 |
| 4         | -5.14 | -2.28 | 2.86 | -5.17              | -2.40              | 2.77 | -5.23 | -3.03 | 2.20 |
| 5         | -4.81 | -1.83 | 2.98 | -4.89              | -1.89              | 3.00 | -5.05 | -2.73 | 2.32 |
| 6         | -4.88 | -1.92 | 2.96 | -4.97              | -1.99              | 2.98 | -5.12 | -2.74 | 2.38 |
| 7         | -5.39 | -2.52 | 2.87 | -5.44              | -2.61              | 2.83 | -5.34 | -3.27 | 2.07 |
| 8         | -5.00 | -2.09 | 2.91 | -5.02              | -2.34              | 2.68 | -5.08 | -2.86 | 2.21 |
| 9         | -5.07 | -2.05 | 3.02 | -5.04              | -2.13              | 2.91 | -4.94 | -2.95 | 1.99 |
| 10        | -5.48 | -2.58 | 2.90 | -5.49              | -2.71              | 2.78 | -5.30 | -3.48 | 1.81 |

**S2.** Cyclic voltammograms of compound **1-10** recorded in CH<sub>2</sub>Cl<sub>2</sub> with scan rate of 100mVs<sup>-1</sup>

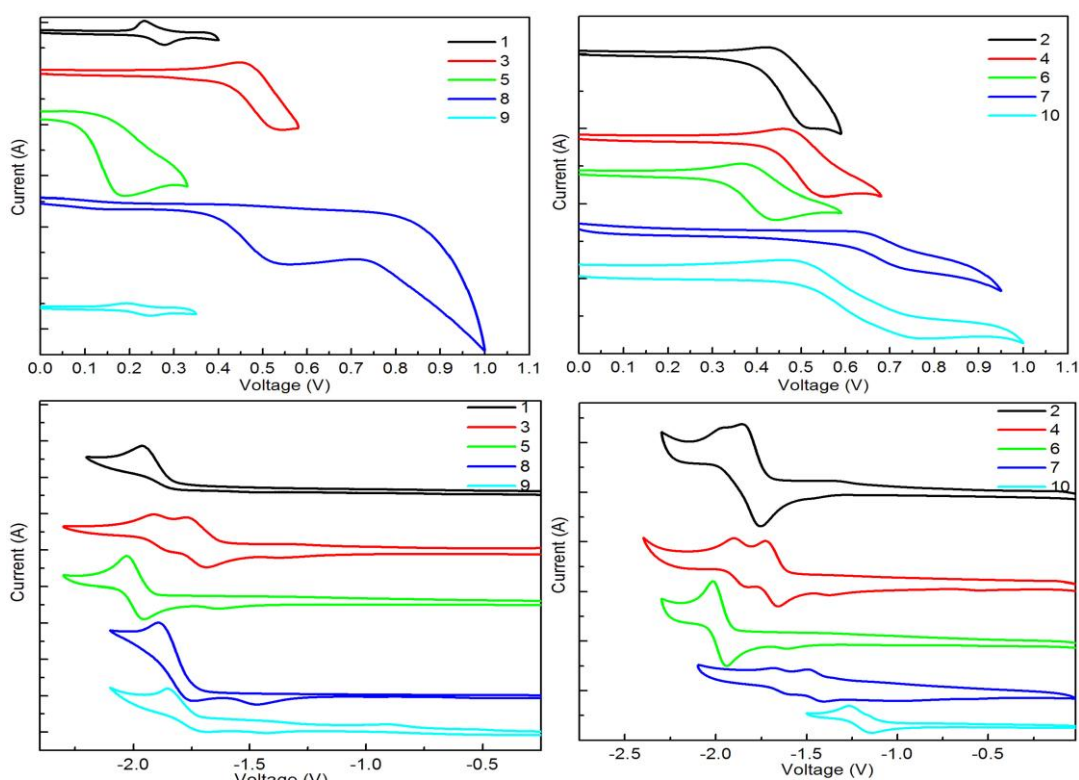

**Table.5.** Electrochemical data and HOMO, LUMO energy level of compounds **1-10**

| Compound  | $E_{\text{ox}}^{1/2}(\text{V})$ | $E_{\text{red}}^{1/2}(\text{V})$ | LUMO  | HOMO  | $E_g$ |
|-----------|---------------------------------|----------------------------------|-------|-------|-------|
| <b>1</b>  | +0.25                           | -1.95                            | -2.78 | -5.05 | 2.26  |
| <b>2</b>  | +0.47                           | -1.80                            | -2.92 | -5.19 | 2.27  |
| <b>3</b>  | +0.49                           | -1.72                            | -2.99 | -5.21 | 2.22  |
| <b>4</b>  | +0.50                           | -1.69                            | -3.03 | -5.23 | 2.20  |
| <b>5</b>  | +0.40                           | -1.99                            | -2.73 | -5.05 | 2.32  |
| <b>6</b>  | +0.41                           | -1.98                            | -2.74 | -5.12 | 2.38  |
| <b>7</b>  | +0.68                           | -1.45                            | -3.27 | -5.34 | 2.07  |
| <b>8</b>  | +0.54                           | -1.82                            | -2.86 | -5.08 | 2.21  |
| <b>9</b>  | +0.22                           | -1.78                            | -2.95 | -4.94 | -1.99 |
| <b>10</b> | +0.62                           | -1.20                            | -3.48 | -5.30 | 1.81  |

**Table.6.** Absolute and relative energies (parenthesis) of **EE**, **EZ** and **ZZ** isomers of Quinacridonediimines **7** and **10**

| Compound  | <b>EE</b>           | <b>EZ</b>            | <b>ZZ</b>            |
|-----------|---------------------|----------------------|----------------------|
| <b>7</b>  | -2757.4270159 (0.0) | -2757.4230023(2.5)   | -2757.4176056 (5.9)  |
| <b>10</b> | -1949.9373194 (0.0) | -1949.9348575 (1.54) | -1949.9288255 (5.33) |

**Table.7.** Calculated energies of EE, EZ and ZZ isomers of Quinacridonediimines **7** and **10**

**7EE**

Total energy -2757.4270159

|   |             |             |             |
|---|-------------|-------------|-------------|
| C | 0.22265900  | -3.67189500 | -0.76631000 |
| N | -0.74561500 | -2.70235800 | -0.25221300 |
| C | -0.36945000 | -1.36874700 | -0.12207600 |
| C | 0.95542800  | -0.95836900 | -0.28274600 |
| C | 1.33653200  | 0.37729700  | -0.17002000 |
| C | 0.36944900  | 1.36874500  | 0.12206100  |
| C | -0.95542800 | 0.95836700  | 0.28273100  |
| H | -1.75916500 | 1.65900400  | 0.46887600  |
| C | -1.33653300 | -0.37729800 | 0.17000400  |
| C | -2.75716100 | -0.73650800 | 0.28197000  |
| C | -3.01491300 | -2.16604500 | 0.47277800  |
| C | -2.00019100 | -3.11490300 | 0.16756900  |
| C | -2.29643400 | -4.48761400 | 0.31311700  |
| C | -3.52506700 | -4.90494500 | 0.79120600  |
| C | -4.50232200 | -3.97417500 | 1.15846900  |
| C | -4.23697400 | -2.62859500 | 0.99525000  |
| H | -4.98356400 | -1.90133100 | 1.29123500  |

|   |             |             |             |
|---|-------------|-------------|-------------|
| H | -5.45235100 | -4.30086200 | 1.57006800  |
| H | -3.71407600 | -5.96939600 | 0.90327000  |
| H | -1.54671100 | -5.23562900 | 0.08754700  |
| N | -3.60132400 | 0.24660700  | 0.24175600  |
| C | -4.97145600 | 0.17536700  | 0.10237900  |
| C | -5.60557500 | -0.45780800 | -0.98203900 |
| C | -6.97396300 | -0.35717100 | -1.19852200 |
| C | -7.76225100 | 0.40260500  | -0.33918500 |
| C | -7.16553100 | 1.05163300  | 0.73741200  |
| C | -5.79345900 | 0.95436400  | 0.93467600  |
| F | -5.24843000 | 1.60070800  | 1.97054800  |
| F | -7.91233700 | 1.78003900  | 1.57048900  |
| F | -9.07806000 | 0.49859600  | -0.53946600 |
| F | -7.53587400 | -0.98116400 | -2.23644000 |
| F | -4.87663800 | -1.18811700 | -1.83300900 |
| N | 0.74561500  | 2.70235500  | 0.25220200  |
| C | 2.00019200  | 3.11490100  | -0.16757800 |
| C | 3.01491300  | 2.16604300  | -0.47278700 |
| C | 4.23696900  | 2.62859000  | -0.99527100 |
| C | 4.50231800  | 3.97416900  | -1.15849400 |
| C | 3.52506600  | 4.90494100  | -0.79122800 |
| C | 2.29643400  | 4.48761200  | -0.31313200 |
| H | 1.54671200  | 5.23562700  | -0.08756500 |
| H | 3.71407300  | 5.96939100  | -0.90329900 |
| H | 5.45234500  | 4.30085400  | -1.57010000 |
| H | 4.98355600  | 1.90132300  | -1.29126200 |
| C | 2.75716100  | 0.73650700  | -0.28198300 |
| N | 3.60132700  | -0.24660400 | -0.24176900 |



|   |             |             |             |
|---|-------------|-------------|-------------|
| C | 4.97145500  | -0.17536200 | -0.10237500 |
| C | 5.79346900  | -0.95435000 | -0.93467400 |
| C | 7.16553900  | -1.05162000 | -0.73739700 |
| C | 7.76224700  | -0.40260700 | 0.33921600  |
| C | 6.97394800  | 0.35715600  | 1.19855500  |
| C | 5.60556300  | 0.45779600  | 0.98205900  |
| F | 4.87661600  | 1.18809100  | 1.83303200  |
| F | 7.53584800  | 0.98113400  | 2.23648800  |
| F | 9.07805300  | -0.49859800 | 0.53950900  |
| F | 7.91235300  | -1.78001400 | -1.57047600 |
| F | 5.24845000  | -1.60068000 | -1.97056000 |
| C | -0.22266000 | 3.67189200  | 0.76629900  |
| H | -0.83026700 | 3.15965300  | 1.51851500  |
| H | 0.33223500  | 4.44032000  | 1.31300100  |
| C | -1.12023400 | 4.30657600  | -0.29944100 |
| H | -1.64821500 | 3.51683400  | -0.84889900 |
| H | -0.50024600 | 4.82827400  | -1.04035800 |
| C | -2.13377600 | 5.27756000  | 0.30855800  |
| H | -2.75251100 | 4.74358600  | 1.04327100  |
| H | -1.60224600 | 6.06018100  | 0.86915400  |
| C | -3.03504400 | 5.92483900  | -0.74027200 |
| H | -3.75381800 | 6.60967700  | -0.27749100 |
| H | -2.44933400 | 6.49803300  | -1.46895400 |
| H | -3.60408900 | 5.16832300  | -1.29329700 |
| H | 1.75916500  | -1.65900600 | -0.46888900 |
| H | -0.33223800 | -4.44032800 | -1.31300500 |
| H | 0.83026100  | -3.15965900 | -1.51853200 |
| C | 1.12024100  | -4.30657200 | 0.29942900  |

|   |            |             |             |
|---|------------|-------------|-------------|
| H | 1.64821800 | -3.51682400 | 0.84888300  |
| H | 0.50025900 | -4.82827200 | 1.04034900  |
| C | 2.13378700 | -5.27755000 | -0.30857200 |
| H | 1.60226100 | -6.06017500 | -0.86916600 |
| H | 2.75251700 | -4.74357300 | -1.04328700 |
| C | 3.03506200 | -5.92482300 | 0.74025700  |
| H | 2.44935600 | -6.49802000 | 1.46893900  |
| H | 3.75383900 | -6.60965600 | 0.27747400  |
| H | 3.60410200 | -5.16830300 | 1.29328000  |

## 7EZ

Total energy        -2757.4230023

|   |            |             |             |
|---|------------|-------------|-------------|
| N | 0.49666700 | 3.36201400  | 0.06494700  |
| C | 1.70283300 | 4.02141100  | -0.13450900 |
| C | 1.75335400 | 5.42082100  | -0.31357400 |
| C | 2.96320100 | 6.06847900  | -0.49426100 |
| C | 4.16655800 | 5.35373000  | -0.50363700 |
| C | 4.13060200 | 3.98444400  | -0.32579600 |
| C | 2.91834900 | 3.29770100  | -0.14472100 |
| C | 2.93048100 | 1.85102700  | 0.09460300  |
| N | 4.07218000 | 1.30354100  | 0.35826300  |
| C | 4.35612900 | 0.05279200  | 0.85256800  |
| C | 3.81998700 | -0.41498900 | 2.07399900  |
| H | 3.08743500 | 0.19415700  | 2.59502700  |
| C | 4.23404000 | -1.61999800 | 2.61612700  |
| C | 5.19516000 | -2.40703000 | 1.95770100  |
| C | 5.74406700 | -1.94369800 | 0.74944600  |

|   |             |             |             |
|---|-------------|-------------|-------------|
| C | 5.33965400  | -0.73188600 | 0.21407000  |
| H | 5.78126200  | -0.36168800 | -0.70640200 |
| H | 6.50144600  | -2.53645700 | 0.24467200  |
| H | 3.81855100  | -1.96269000 | 3.55947100  |
| H | 5.03944900  | 3.39149400  | -0.31519400 |
| H | 5.11253100  | 5.86647400  | -0.65032200 |
| H | 2.96657000  | 7.14571200  | -0.63970900 |
| H | 0.84272000  | 6.00643100  | -0.33773500 |
| C | -0.73476500 | 4.12774600  | 0.26441100  |
| H | -1.38250700 | 3.54987600  | 0.93069600  |
| H | -0.47316100 | 5.02985200  | 0.82263300  |
| C | -1.47270100 | 4.46981300  | -1.03401700 |
| H | -0.82533100 | 5.08984900  | -1.66830200 |
| H | -1.64479100 | 3.54263700  | -1.59382300 |
| C | -2.81087400 | 5.18057300  | -0.80423400 |
| H | -3.45205500 | 4.55292700  | -0.16905100 |
| H | -3.32710100 | 5.25639700  | -1.76964800 |
| C | -2.69347600 | 6.57691200  | -0.19295600 |
| H | -2.05735100 | 7.22599900  | -0.80771600 |
| H | -3.67655000 | 7.05438100  | -0.11900600 |
| H | -2.27059000 | 6.55441100  | 0.81796700  |
| C | 5.61137400  | -3.65540200 | 2.51078300  |
| N | 5.94395600  | -4.67889900 | 2.95609000  |
| C | -0.78731000 | 1.30458900  | -0.07965900 |
| C | -0.87759700 | -0.07561500 | -0.23108200 |
| C | 0.29776800  | -0.85391700 | -0.34291700 |
| C | 1.52461900  | -0.19082700 | -0.23953300 |
| H | 2.44801600  | -0.74331400 | -0.33133700 |

|   |             |             |             |
|---|-------------|-------------|-------------|
| N | 0.21483100  | -2.23027100 | -0.53361900 |
| C | -1.00092500 | -2.81947000 | -0.85311500 |
| C | -2.21985600 | -2.09357000 | -0.74323100 |
| C | -3.41597200 | -2.71076800 | -1.15606100 |
| C | -3.44833800 | -4.01417600 | -1.61281900 |
| C | -2.25524500 | -4.74057500 | -1.66680500 |
| C | -1.05516400 | -4.15689100 | -1.30262400 |
| H | -0.14842500 | -4.73952000 | -1.40214300 |
| H | -2.25575300 | -5.76909700 | -2.01819700 |
| H | -4.38581900 | -4.46156300 | -1.92835900 |
| H | -4.33490900 | -2.13914400 | -1.12240300 |
| C | -2.20481200 | -0.71313000 | -0.24619300 |
| N | -3.20043100 | 0.01716900  | 0.13620700  |
| C | -4.49653500 | -0.36053700 | 0.42063300  |
| C | -5.56683600 | 0.26509500  | -0.24903400 |
| C | -6.87988600 | -0.01489800 | 0.09323100  |
| C | -7.16675200 | -0.90856500 | 1.13807300  |
| C | -6.10480200 | -1.51494700 | 1.83011100  |
| C | -4.79289300 | -1.24746800 | 1.47737500  |
| H | -3.97538200 | -1.71346900 | 2.01939900  |
| H | -6.31992300 | -2.19822100 | 2.64647900  |
| H | -7.69594800 | 0.46368500  | -0.44014300 |
| H | -5.34388100 | 0.96828100  | -1.04612500 |
| C | 1.43124700  | -3.04444000 | -0.48547500 |
| H | 2.09951200  | -2.60640400 | 0.26126600  |
| H | 1.15970300  | -4.02544900 | -0.08483700 |
| C | 2.14454100  | -3.18908100 | -1.83276600 |
| H | 2.47555700  | -2.20064100 | -2.17794300 |

|   |             |             |             |
|---|-------------|-------------|-------------|
| H | 1.43155700  | -3.54827500 | -2.58649600 |
| C | 3.34048100  | -4.13898200 | -1.75621500 |
| H | 4.03885900  | -3.78399700 | -0.98688000 |
| H | 2.99963800  | -5.12954800 | -1.42254300 |
| C | 4.07262000  | -4.27570900 | -3.08910200 |
| H | 4.91925700  | -4.96579900 | -3.00700600 |
| H | 3.40631600  | -4.65732300 | -3.87213100 |
| H | 4.46213300  | -3.30853500 | -3.42887100 |
| H | -1.73366700 | 1.82727200  | -0.03185700 |
| C | -8.51969700 | -1.19100200 | 1.49682000  |
| N | -9.62343600 | -1.42261400 | 1.78695700  |
| C | 0.43649300  | 1.97520700  | -0.01557500 |
| C | 1.62192100  | 1.18968400  | -0.04260000 |

## 7 ZZ

Total Energy                    -2757.4176056

|   |             |            |             |
|---|-------------|------------|-------------|
| C | -2.67524300 | 2.37816700 | -1.20928500 |
| H | -2.62748100 | 1.56614900 | -1.94206900 |
| H | -2.71801300 | 3.30086300 | -1.79503600 |
| C | -3.92136300 | 2.22759100 | -0.33112300 |
| H | -3.91590900 | 2.99796800 | 0.45050900  |
| H | -3.86959300 | 1.26805900 | 0.19597100  |
| C | -5.23199800 | 2.30557200 | -1.12330700 |
| H | -5.21584600 | 1.56659700 | -1.93682400 |
| H | -6.05053000 | 1.99846500 | -0.46110700 |
| C | -5.54806800 | 3.68880200 | -1.69293700 |
| H | -5.58930400 | 4.44311000 | -0.89721500 |

|   |             |             |             |
|---|-------------|-------------|-------------|
| H | -6.52071300 | 3.68929000  | -2.19667400 |
| H | -4.80505200 | 4.01835400  | -2.42865100 |
| N | -1.40472600 | 2.39296700  | -0.48095900 |
| C | -0.90586400 | 3.59347800  | 0.00972400  |
| C | -1.70266400 | 4.75757200  | 0.04798000  |
| C | -1.19567300 | 5.94478100  | 0.54760900  |
| C | 0.11967400  | 6.02377700  | 1.02041000  |
| C | 0.91862000  | 4.89868000  | 0.96300300  |
| C | 0.43031400  | 3.67924900  | 0.46459000  |
| C | 1.33149200  | 2.53610900  | 0.31284300  |
| C | 0.65477400  | 1.23920700  | 0.14886000  |
| C | -0.70648800 | 1.21115200  | -0.25731900 |
| C | -1.31477200 | -0.03800400 | -0.41469900 |
| H | -2.34697900 | -0.09555900 | -0.72987500 |
| C | -0.65473100 | -1.23907600 | -0.14892600 |
| C | 0.70653900  | -1.21102400 | 0.25723600  |
| C | 1.31482100  | 0.03813600  | 0.41462400  |
| H | 2.34702500  | 0.09569700  | 0.72980700  |
| N | 1.40476500  | -2.39284800 | 0.48087900  |
| C | 0.90589100  | -3.59335100 | -0.00980400 |
| C | 1.70270000  | -4.75743800 | -0.04810100 |
| C | 1.19570700  | -5.94464000 | -0.54774400 |
| C | -0.11965000 | -6.02363400 | -1.02052200 |
| C | -0.91859800 | -4.89854100 | -0.96308500 |
| C | -0.43028800 | -3.67911600 | -0.46466200 |
| C | -1.33146100 | -2.53597800 | -0.31289100 |
| N | -2.60120200 | -2.77961500 | -0.37294700 |
| C | -3.63894200 | -1.96610700 | 0.02241300  |

|   |             |             |             |
|---|-------------|-------------|-------------|
| C | -3.77420900 | -1.51008000 | 1.34743300  |
| C | -4.93221200 | -0.89001700 | 1.80120100  |
| C | -6.00471700 | -0.70081500 | 0.93421200  |
| C | -5.90374100 | -1.13959200 | -0.38216300 |
| C | -4.74845700 | -1.77568800 | -0.81887500 |
| F | -4.68471800 | -2.19205800 | -2.08739300 |
| F | -6.91764200 | -0.93669300 | -1.22705500 |
| F | -7.10627800 | -0.06935700 | 1.34912900  |
| F | -5.02117400 | -0.47844100 | 3.06757400  |
| F | -2.76763600 | -1.69381900 | 2.20847200  |
| H | -1.95290700 | -4.92175800 | -1.29069000 |
| H | -0.50788700 | -6.95613800 | -1.41919100 |
| H | 1.83975500  | -6.81977300 | -0.57802500 |
| H | 2.73164800  | -4.73180600 | 0.28830500  |
| C | 2.67527900  | -2.37809100 | 1.20921200  |
| H | 2.62761400  | -1.56598300 | 1.94190400  |
| H | 2.71792700  | -3.30072400 | 1.79507000  |
| C | 3.92143000  | -2.22782800 | 0.33104200  |
| H | 3.91584300  | -2.99830100 | -0.45049600 |
| H | 3.86983900  | -1.26835000 | -0.19616900 |
| C | 5.23204300  | -2.30596400 | 1.12324600  |
| H | 5.21603600  | -1.56686800 | 1.93665700  |
| H | 6.05064500  | -1.99912300 | 0.46101000  |
| C | 5.54782200  | -3.68917700 | 1.69307700  |
| H | 5.58890400  | -4.44360800 | 0.89746500  |
| H | 6.52046500  | -3.68979400 | 2.19681800  |
| H | 4.80473400  | -4.01846700 | 2.42883600  |
| N | 2.60123300  | 2.77973500  | 0.37291100  |

|   |             |            |             |
|---|-------------|------------|-------------|
| C | 3.63895600  | 1.96617400 | -0.02237700 |
| C | 3.77416500  | 1.50996900 | -1.34734100 |
| C | 4.93214400  | 0.88983100 | -1.80106900 |
| C | 6.00468200  | 0.70073800 | -0.93409700 |
| C | 5.90376000  | 1.13968800 | 0.38222300  |
| C | 4.74849600  | 1.77584500 | 0.81889800  |
| F | 4.68480300  | 2.19237000 | 2.08736800  |
| F | 6.91768600  | 0.93687900 | 1.22710700  |
| F | 7.10621700  | 0.06920600 | -1.34897000 |
| F | 5.02105000  | 0.47807900 | -3.06738900 |
| F | 2.76755500  | 1.69359300 | -2.20836100 |
| H | 1.95292500  | 4.92190000 | 1.29061900  |
| H | 0.50791000  | 6.95628600 | 1.41906800  |
| H | -1.83971500 | 6.81992000 | 0.57785800  |
| H | -2.73160100 | 4.73194700 | -0.28845700 |

## 10 EE

Total energy            -1949.9373194

|   |             |             |             |
|---|-------------|-------------|-------------|
| C | 0.13676500  | 3.62716100  | 0.97038400  |
| N | -0.81860200 | 2.65955900  | 0.43056400  |
| C | -0.40731300 | 1.34795300  | 0.20998100  |
| C | 0.93056900  | 0.96496400  | 0.33058500  |
| C | 1.34900900  | -0.34932600 | 0.13313000  |
| C | 0.40730600  | -1.34793600 | -0.21000500 |
| C | -0.93057600 | -0.96494700 | -0.33061000 |
| H | -1.71739000 | -1.67493600 | -0.55123800 |
| C | -1.34901600 | 0.34934300  | -0.13315600 |



|   |             |             |             |
|---|-------------|-------------|-------------|
| C | -2.78293500 | 0.67095200  | -0.21667300 |
| C | -3.09156200 | 2.10524500  | -0.27921400 |
| C | -2.09752500 | 3.06049400  | 0.07332900  |
| C | -2.43960500 | 4.42986300  | 0.04205400  |
| C | -3.69645500 | 4.84302000  | -0.36192100 |
| C | -4.65807000 | 3.91224000  | -0.76577500 |
| C | -4.34613400 | 2.56694400  | -0.72039100 |
| H | -5.08331600 | 1.84227900  | -1.04266900 |
| H | -5.63320200 | 4.23723500  | -1.11521400 |
| H | -3.92021900 | 5.90641900  | -0.38462000 |
| H | -1.70665600 | 5.18387300  | 0.30028100  |
| N | -3.60106600 | -0.32926300 | -0.26538700 |
| C | -4.97340900 | -0.33558300 | -0.12883300 |
| C | -5.60044600 | 0.08532500  | 1.06352400  |
| C | -6.96818000 | -0.04967300 | 1.23031600  |
| C | -7.75919500 | -0.60675300 | 0.21121700  |
| C | -7.14150300 | -1.03892900 | -0.97390200 |
| C | -5.77063600 | -0.91846900 | -1.13419900 |
| H | -5.29022400 | -1.26704600 | -2.04371600 |
| H | -7.74569300 | -1.47790100 | -1.76242800 |
| H | -7.43832600 | 0.27624000  | 2.15358300  |
| H | -4.99270900 | 0.51045900  | 1.85678200  |
| N | 0.81859400  | -2.65954300 | -0.43058800 |
| C | 2.09751800  | -3.06047800 | -0.07335600 |
| C | 3.09155500  | -2.10522800 | 0.27918500  |
| C | 4.34613200  | -2.56692400 | 0.72035000  |
| C | 4.65807100  | -3.91222000 | 0.76573100  |
| C | 3.69645400  | -4.84300100 | 0.36188400  |

|   |             |             |             |
|---|-------------|-------------|-------------|
| C | 2.43960100  | -4.42984600 | -0.04208400 |
| H | 1.70665200  | -5.18385700 | -0.30030700 |
| H | 3.92022100  | -5.90640000 | 0.38458000  |
| H | 5.63320700  | -4.23721300 | 1.11516100  |
| H | 5.08331600  | -1.84225700 | 1.04262000  |
| C | 2.78292800  | -0.67093600 | 0.21664700  |
| N | 3.60106200  | 0.32927500  | 0.26537200  |
| C | 4.97340800  | 0.33558300  | 0.12884700  |
| C | 5.77061900  | 0.91848600  | 1.13421600  |
| C | 7.14149100  | 1.03892900  | 0.97394500  |
| C | 7.75920500  | 0.60671500  | -0.21114900 |
| C | 6.96820600  | 0.04961400  | -1.23025000 |
| C | 5.60046700  | -0.08536500 | -1.06348500 |
| H | 4.99274300  | -0.51051600 | -1.85674400 |
| H | 7.43836900  | -0.27632900 | -2.15349700 |
| H | 7.74566800  | 1.47791600  | 1.76247200  |
| H | 5.29019100  | 1.26709100  | 2.04371300  |
| C | -0.13677400 | -3.62714500 | -0.97040700 |
| H | -0.78667800 | -3.09242800 | -1.66962400 |
| H | 0.42023200  | -4.34333600 | -1.58189000 |
| C | -0.97303500 | -4.35248800 | 0.08690400  |
| H | -1.51912900 | -3.61484300 | 0.68852200  |
| H | -0.30671500 | -4.87787900 | 0.78356800  |
| C | -1.95899400 | -5.34220400 | -0.53619200 |
| H | -2.62252600 | -4.80686700 | -1.22984900 |
| H | -1.40880100 | -6.07408100 | -1.14515900 |
| C | -2.79932500 | -6.07514300 | 0.50692400  |
| H | -3.49689500 | -6.77503400 | 0.03442400  |

|   |              |             |             |
|---|--------------|-------------|-------------|
| H | -2.16653100  | -6.64816600 | 1.19519200  |
| H | -3.38835900  | -5.37073700 | 1.10576000  |
| H | 1.71738300   | 1.67495300  | 0.55121300  |
| H | -0.42024300  | 4.34335900  | 1.58185800  |
| H | 0.78666200   | 3.09244700  | 1.66961000  |
| C | 0.97303600   | 4.35249600  | -0.08692600 |
| H | 1.51913400   | 3.61484600  | -0.68853300 |
| H | 0.30672300   | 4.87788300  | -0.78359800 |
| C | 1.95899200   | 5.34221400  | 0.53617200  |
| H | 1.40879500   | 6.07409700  | 1.14512900  |
| H | 2.62251700   | 4.80688100  | 1.22983900  |
| C | 2.79933200   | 6.07514400  | -0.50694300 |
| H | 2.16654500   | 6.64816300  | -1.19522000 |
| H | 3.49690000   | 6.77503800  | -0.03444200 |
| H | 3.38837000   | 5.37073300  | -1.10576900 |
| C | 9.17069000   | 0.73891100  | -0.38113100 |
| C | -9.17067600  | -0.73896700 | 0.38122600  |
| N | 10.32217900  | 0.84522000  | -0.51879700 |
| N | -10.32216100 | -0.84529100 | 0.51891400  |

10 EZ

Total energy -1949.9348575

|   |            |            |             |
|---|------------|------------|-------------|
| C | 1.60449100 | 1.37885500 | -0.23008300 |
| C | 0.39927000 | 2.06281100 | 0.08731300  |
| N | 0.37552200 | 3.44665700 | 0.21014200  |
| C | 1.44091400 | 4.20270000 | -0.25964200 |
| C | 1.33829700 | 5.60205400 | -0.41139700 |

|   |             |             |             |
|---|-------------|-------------|-------------|
| C | 2.41151400  | 6.34311200  | -0.87501200 |
| C | 3.62515900  | 5.72589700  | -1.20124200 |
| C | 3.74358600  | 4.35889100  | -1.04274200 |
| C | 2.67021600  | 3.57956300  | -0.57953200 |
| C | 2.85377800  | 2.14564000  | -0.34699700 |
| N | 4.07191600  | 1.70683500  | -0.30874700 |
| C | 4.50612900  | 0.48589600  | 0.15741400  |
| C | 4.27164600  | 0.05026400  | 1.47544200  |
| C | 4.89068900  | -1.07664100 | 2.00305400  |
| C | 5.77661000  | -1.81336300 | 1.22183500  |
| C | 6.03380000  | -1.40786300 | -0.08389900 |
| C | 5.42236500  | -0.26955600 | -0.59433700 |
| F | 5.69304600  | 0.09476900  | -1.85170000 |
| F | 6.86283000  | -2.12385700 | -0.84799400 |
| F | 6.34997800  | -2.91764400 | 1.70763800  |
| F | 4.64299200  | -1.45233200 | 3.25961800  |
| F | 3.43834400  | 0.74561000  | 2.25664100  |
| H | 4.67166600  | 3.84184300  | -1.26420300 |
| H | 4.46092900  | 6.31272900  | -1.57054200 |
| H | 2.29690600  | 7.41761500  | -0.99317200 |
| H | 0.40867100  | 6.11262500  | -0.19132600 |
| C | -0.80549500 | 4.10479800  | 0.76936100  |
| H | -1.21177300 | 3.44844000  | 1.54503000  |
| H | -0.46364900 | 5.00219600  | 1.29453200  |
| C | -1.89234000 | 4.46096500  | -0.24880000 |
| H | -1.47553900 | 5.12742900  | -1.01519900 |
| H | -2.21256500 | 3.55465500  | -0.77791700 |
| C | -3.09941000 | 5.12315300  | 0.41767400  |

|   |             |             |             |
|---|-------------|-------------|-------------|
| H | -2.77125200 | 6.02273100  | 0.95836200  |
| H | -3.51137300 | 4.44477800  | 1.17788600  |
| C | -4.19530900 | 5.49757200  | -0.57736200 |
| H | -4.56852200 | 4.61268500  | -1.10614700 |
| H | -5.04643900 | 5.96695400  | -0.07224100 |
| H | -3.82429400 | 6.20258100  | -1.33100500 |
| C | 1.49110100  | -2.74988100 | -1.31113600 |
| N | 0.36196400  | -2.11535600 | -0.62723000 |
| C | 0.39707300  | -0.75156500 | -0.34765200 |
| C | -0.77896500 | -0.07702000 | 0.05627500  |
| C | -2.05286700 | -0.80258700 | 0.17649600  |
| C | -1.92714100 | -2.26060200 | 0.21698400  |
| C | -0.72665500 | -2.87759400 | -0.23017300 |
| C | -0.66367200 | -4.28788500 | -0.25096000 |
| C | -1.71789300 | -5.05549700 | 0.20934500  |
| C | -2.87103000 | -4.45240600 | 0.72180600  |
| C | -2.96072800 | -3.07435200 | 0.71703900  |
| H | -3.84641900 | -2.59865000 | 1.12090600  |
| H | -3.68193300 | -5.05464700 | 1.11974800  |
| H | -1.62865100 | -6.13855500 | 0.19215300  |
| H | 0.23163000  | -4.79130500 | -0.59280500 |
| N | -3.11962900 | -0.07236600 | 0.26779500  |
| C | -4.43391800 | -0.48080600 | 0.17507000  |
| C | -4.95855500 | -1.14893700 | -0.94577800 |
| C | -6.31948500 | -1.38464400 | -1.09410300 |
| C | -7.21421500 | -0.93929800 | -0.12538900 |
| C | -6.72983500 | -0.26419600 | 0.99086200  |
| C | -5.36753100 | -0.02276400 | 1.12036300  |

|   |             |             |             |
|---|-------------|-------------|-------------|
| H | 1.08318500  | -3.54168600 | -1.94473800 |
| H | 1.91463400  | -2.01315200 | -2.00141900 |
| C | 2.57986200  | -3.29187900 | -0.38018800 |
| H | 2.98763400  | -2.46068000 | 0.20675600  |
| H | 2.13217700  | -3.98105700 | 0.34768600  |
| C | 3.71877700  | -3.99574500 | -1.12747300 |
| H | 4.12712500  | -3.32201900 | -1.89394900 |
| H | 4.53774700  | -4.16810300 | -0.41859400 |
| C | 3.33043300  | -5.32729100 | -1.77070600 |
| H | 2.57285400  | -5.20938400 | -2.55468600 |
| H | 4.20085900  | -5.80274700 | -2.23560300 |
| H | 2.93407600  | -6.02624900 | -1.02363300 |
| C | -0.75778200 | 1.30054600  | 0.25455700  |
| C | 1.56899200  | 0.00214900  | -0.46829300 |
| H | -1.71232700 | 1.74901800  | 0.49759400  |
| H | 2.49575200  | -0.47970600 | -0.74549800 |
| F | -4.93412200 | 0.63985700  | 2.19735500  |
| F | -7.57845900 | 0.16398700  | 1.92800100  |
| F | -8.52184700 | -1.16744100 | -0.26046300 |
| F | -6.77446300 | -2.03049000 | -2.17016800 |
| F | -4.12727400 | -1.58175600 | -1.90000200 |

**10ZZ**

Total energy -1949.9288255

|   |            |             |             |
|---|------------|-------------|-------------|
| C | 3.04454600 | -1.88179900 | -1.21524200 |
| H | 2.84994000 | -1.08413300 | -1.93935900 |
| H | 3.22163600 | -2.78254800 | -1.81018600 |
| C | 4.27305100 | -1.53711900 | -0.36814100 |

|   |             |             |             |
|---|-------------|-------------|-------------|
| H | 4.39782500  | -2.28584900 | 0.42475000  |
| H | 4.10259200  | -0.58344800 | 0.14426100  |
| C | 5.55894200  | -1.44640300 | -1.19882400 |
| H | 5.41066900  | -0.73167500 | -2.02070900 |
| H | 6.34389800  | -1.01626300 | -0.56612300 |
| C | 6.05382700  | -2.78036500 | -1.75891600 |
| H | 6.23309200  | -3.50400200 | -0.95401000 |
| H | 6.99968800  | -2.64890600 | -2.29560700 |
| H | 5.34503500  | -3.23126600 | -2.46368000 |
| N | 1.80715700  | -2.10982600 | -0.46366500 |
| C | 1.52644500  | -3.38129100 | 0.02120000  |
| C | 2.51382000  | -4.38955500 | 0.04669100  |
| C | 2.22313500  | -5.65152000 | 0.53555100  |
| C | 0.94336800  | -5.96200200 | 1.01041800  |
| C | -0.03795700 | -4.99102400 | 0.96790400  |
| C | 0.22773200  | -3.70093300 | 0.47923300  |
| C | -0.86190000 | -2.73082400 | 0.34383700  |
| C | -0.42562300 | -1.33421900 | 0.16305700  |
| C | 0.91129300  | -1.06920400 | -0.24323100 |
| C | 1.29144500  | 0.26669400  | -0.40952300 |
| H | 2.30269200  | 0.50385800  | -0.70957800 |
| C | 0.42562500  | 1.33423700  | -0.16306800 |
| C | -0.91129100 | 1.06922100  | 0.24321600  |
| C | -1.29144300 | -0.26667600 | 0.40951300  |
| H | -2.30268700 | -0.50383700 | 0.70957800  |
| N | -1.80715400 | 2.10984100  | 0.46366000  |
| C | -1.52644300 | 3.38131000  | -0.02119500 |
| C | -2.51381800 | 4.38957300  | -0.04668900 |

|   |             |            |             |
|---|-------------|------------|-------------|
| C | -2.22313200 | 5.65154000 | -0.53554100 |
| C | -0.94336300 | 5.96202600 | -1.01040000 |
| C | 0.03796200  | 4.99104800 | -0.96788800 |
| C | -0.22772800 | 3.70095500 | -0.47922500 |
| C | 0.86190300  | 2.73084300 | -0.34383400 |
| N | 2.06808500  | 3.18454800 | -0.43416200 |
| C | 3.26489500  | 2.62914800 | -0.05662500 |
| C | 3.49240600  | 2.17697800 | 1.26357200  |
| H | 2.66344300  | 2.16105900 | 1.96487600  |
| C | 4.75851700  | 1.79673000 | 1.67532900  |
| C | 5.84274500  | 1.84051600 | 0.78169000  |
| C | 5.62560200  | 2.28562300 | -0.53380800 |
| C | 4.36317800  | 2.68141700 | -0.94156100 |
| H | 4.20161200  | 3.05582300 | -1.94807600 |
| H | 6.46069000  | 2.33172700 | -1.22662700 |
| H | 4.92080000  | 1.46470400 | 2.69675600  |
| H | 1.05088100  | 5.19602300 | -1.29905400 |
| H | -0.72406800 | 6.95156200 | -1.40024800 |
| H | -3.00966700 | 6.40150700 | -0.55568600 |
| H | -3.52113700 | 4.18207700 | 0.29131100  |
| C | -3.04454400 | 1.88179800 | 1.21523200  |
| H | -2.84994000 | 1.08410300 | 1.93931800  |
| H | -3.22162600 | 2.78252500 | 1.81021100  |
| C | -4.27305400 | 1.53716100 | 0.36812100  |
| H | -4.39784100 | 2.28594300 | -0.42471900 |
| H | -4.10259200 | 0.58352600 | -0.14434500 |
| C | -5.55893800 | 1.44637600 | 1.19880900  |
| H | -5.41064900 | 0.73159900 | 2.02064900  |



|   |             |             |             |
|---|-------------|-------------|-------------|
| H | -6.34389100 | 1.01626400  | 0.56608700  |
| C | -6.05384000 | 2.78029600  | 1.75898500  |
| H | -6.23312100 | 3.50397900  | 0.95412500  |
| H | -6.99969600 | 2.64878900  | 2.29567500  |
| H | -5.34505100 | 3.23116500  | 2.46377400  |
| N | -2.06808100 | -3.18452800 | 0.43417900  |
| C | -3.26489400 | -2.62914500 | 0.05662300  |
| C | -3.49242000 | -2.17705500 | -1.26359900 |
| H | -2.66346900 | -2.16118700 | -1.96491700 |
| C | -4.75853500 | -1.79682400 | -1.67536100 |
| C | -5.84275000 | -1.84054100 | -0.78170200 |
| C | -5.62558900 | -2.28556600 | 0.53382100  |
| C | -4.36316300 | -2.68134900 | 0.94157900  |
| H | -4.20158500 | -3.05569200 | 1.94811400  |
| H | -6.46066700 | -2.33161800 | 1.22665600  |
| H | -4.92083100 | -1.46486100 | -2.69680700 |
| H | -1.05087500 | -5.19599700 | 1.29907500  |
| H | 0.72407300  | -6.95153600 | 1.40027000  |
| H | 3.00967000  | -6.40148800 | 0.55569300  |
| H | 3.52113600  | -4.18206100 | -0.29131900 |
| C | 7.14466800  | 1.43310600  | 1.20140100  |
| C | -7.14467400 | -1.43314400 | -1.20141800 |
| N | -8.20522800 | -1.08743400 | -1.53698300 |
| N | 8.20521900  | 1.08738500  | 1.53696100  |
